# Supplementary material for: The evolutionary mechanism of non-carbapenemase carbapenem-resistant phenotypes in Klebsiella spp
Source: eLife. 2023 Jul 6;12:e83107. doi: 10.7554/eLife.83107 (PMC10325707; doi:10.7554/eLife.83107)
Supplement: Figure 1—source data 1. [file elife-83107-fig1-data1.xlsx]

## Sheet: Source data
Figure supplement 1-source data 1
	strain	ST	BioSample	taxonomy_name	collection_date	country	specific_host	name
	GCF_000009885.1_ASM988v1	ST23	SAMD00060934	Klebsiella pneumoniae subsp. pneumoniae	2007	Taiwan	Human	GCF_000009885.1_ASM988v1 Taiwan 2007
	GCF_000016305.1_ASM1630v1	ST38	SAMN02603941	Klebsiella pneumoniae subsp. pneumoniae	1994	USA	Human	GCF_000016305.1_ASM1630v1 USA 1994
	GCF_000220485.1_ASM22048v1	ST375	SAMN02603582	Klebsiella pneumoniae	0	NA	NA	GCF_000220485.1_ASM22048v1 NA 0
	GCF_000281435.2_ASM28143v2	ST258	SAMN01057614	Klebsiella pneumoniae subsp. pneumoniae	2011	USA	Human	GCF_000281435.2_ASM28143v2 USA 2011
	GCF_000281535.2_ASM28153v2	ST258	SAMN01057611	Klebsiella pneumoniae subsp. pneumoniae	2011	USA	Human	GCF_000281535.2_ASM28153v2 USA 2011
	GCF_000294365.1_ASM29436v1	ST23	SAMN02603641	Klebsiella pneumoniae subsp. pneumoniae	2002	Taiwan	Human	GCF_000294365.1_ASM29436v1 Taiwan 2002
	GCF_000364385.3_ASM36438v3	ST11	SAMN02152539	Klebsiella pneumoniae	2010	USA	Human	GCF_000364385.3_ASM36438v3 USA 2010
	GCF_000406765.2_ASM40676v2	ST258	SAMN02141993	Klebsiella pneumoniae	2014	USA	Human	GCF_000406765.2_ASM40676v2 USA 2014
	GCF_000417085.2_ASM41708v2	ST258	NA	NA	0	NA	NA	GCF_000417085.2_ASM41708v2 NA 0
	GCF_000417225.2_ASM41722v2	ST258	NA	NA	0	NA	NA	GCF_000417225.2_ASM41722v2 NA 0
	GCF_000417265.2_ASM41726v2	ST258	NA	NA	0	NA	NA	GCF_000417265.2_ASM41726v2 NA 0
	GCF_000445405.1_ASM44540v1	ST11	SAMN02603607	Klebsiella pneumoniae	2010	China	Human	GCF_000445405.1_ASM44540v1 China 2010
	GCF_000465975.2_ASM46597v2	ST29	SAMN02470575	Klebsiella pneumoniae	2013	Australia	NA	GCF_000465975.2_ASM46597v2 Australia 2013
	GCF_000474015.1_ASM47401v1	ST86	SAMN02603668	Klebsiella pneumoniae	2013	China	Human	GCF_000474015.1_ASM47401v1 China 2013
	GCF_000512165.1_ASM51216v1	ST442	SAMN02641520	Klebsiella pneumoniae subsp. pneumoniae	2009	Brazil	Human	GCF_000512165.1_ASM51216v1 Brazil 2009
	GCF_000597905.1_ASM59790v1	ST258	SAMN03081501	Klebsiella pneumoniae	2010	USA	Human	GCF_000597905.1_ASM59790v1 USA 2010
	GCF_000598005.1_ASM59800v1	ST258	SAMN03081502	Klebsiella pneumoniae	2010	USA	Human	GCF_000598005.1_ASM59800v1 USA 2010
	GCF_000695935.1_ASM69593v1	ST34	SAMN02713685	Klebsiella pneumoniae subsp. pneumoniae	2012	USA	Human	GCF_000695935.1_ASM69593v1 USA 2012
	GCF_000714675.1_ASM71467v1	ST258	SAMN02786855	Klebsiella pneumoniae subsp. pneumoniae	2012	USA	Human	GCF_000714675.1_ASM71467v1 USA 2012
	GCF_000717515.1_ASM71751v1	ST258	SAMN02786856	Klebsiella pneumoniae subsp. pneumoniae	2012	USA	Human	GCF_000717515.1_ASM71751v1 USA 2012
	GCF_000733255.1_ASM73325v1	ST14	SAMN03081487	Klebsiella pneumoniae subsp. pneumoniae	2014	USA	Human	GCF_000733255.1_ASM73325v1 USA 2014
	GCF_000739495.1_ASM73949v1	ST395	SAMN02777842	Klebsiella pneumoniae	2012	USA	Human	GCF_000739495.1_ASM73949v1 USA 2012
	GCF_000742755.1_ASM74275v1	ST493	SAMN02982872	Klebsiella pneumoniae subsp. pneumoniae	2000	USA	NA	GCF_000742755.1_ASM74275v1 USA 2000
	GCF_000764615.1_ASM76461v1	ST15	SAMN02885365	Klebsiella pneumoniae	2011	Nepal	Human	GCF_000764615.1_ASM76461v1 Nepal 2011
	GCF_000775375.1_ASM77537v1	ST258	SAMN02720898	Klebsiella pneumoniae subsp. pneumoniae	2013	USA	NA	GCF_000775375.1_ASM77537v1 USA 2013
	GCF_000775395.1_ASM77539v1	ST258	SAMN02820981	Klebsiella pneumoniae subsp. pneumoniae	2013	USA	NA	GCF_000775395.1_ASM77539v1 USA 2013
	GCF_000775955.1_ASM77595v1	ST17	SAMN02649400	Klebsiella pneumoniae	2013	China	Human	GCF_000775955.1_ASM77595v1 China 2013
	GCF_000784945.1_ASM78494v1	ST1518	SAMN02803823	Klebsiella pneumoniae subsp. pneumoniae	2013	USA	NA	GCF_000784945.1_ASM78494v1 USA 2013
	GCF_000784985.1_ASM78498v1	ST258	SAMN02820977	Klebsiella pneumoniae subsp. pneumoniae	2013	USA	NA	GCF_000784985.1_ASM78498v1 USA 2013
	GCF_000785005.1_ASM78500v1	ST392	SAMN02820980	Klebsiella pneumoniae subsp. pneumoniae	2013	USA	NA	GCF_000785005.1_ASM78500v1 USA 2013
	GCF_000813205.1_ASM81320v1	ST86	SAMN03274239	Klebsiella pneumoniae	2015	Taiwan	NA	GCF_000813205.1_ASM81320v1 Taiwan 2015
	GCF_000814305.1_ASM81430v1	ST258	SAMN03067424	Klebsiella pneumoniae	2011	USA	Human	GCF_000814305.1_ASM81430v1 USA 2011
	GCF_000814805.1_ASM81480v1	ST65	SAMN03097203	Klebsiella pneumoniae subsp. pneumoniae	2002	Taiwan	Human	GCF_000814805.1_ASM81480v1 Taiwan 2002
	GCF_000968155.1_ASM96815v1	ST66	SAMEA3283117	Klebsiella pneumoniae	2014	NA	NA	GCF_000968155.1_ASM96815v1 NA 2014
	GCF_000981845.1_ASM98184v1	ST514	SAMN03496739	Klebsiella pneumoniae subsp. pneumoniae	2011	Germany	Human	GCF_000981845.1_ASM98184v1 Germany 2011
	GCF_001022035.1_ASM102203v1	ST11	SAMN03024610	Klebsiella pneumoniae	2011	USA	Human	GCF_001022035.1_ASM102203v1 USA 2011
	GCF_001022175.1_ASM102217v1	ST941	SAMN03024590	Klebsiella pneumoniae	2010	USA	Human	GCF_001022175.1_ASM102217v1 USA 2010
	GCF_001022235.1_ASM102223v1	ST258	SAMN03024583	Klebsiella pneumoniae	2012	USA	Human	GCF_001022235.1_ASM102223v1 USA 2012
	GCF_001278905.1_ASM127890v1	ST480-2LV	SAMN03945398	Klebsiella quasipneumoniae	2013	Hong	NA	GCF_001278905.1_ASM127890v1 Hong 2013
	GCF_001280925.1_ASM128092v1	ST480-2LV	SAMN03955386	Klebsiella quasipneumoniae	2013	Hong	NA	GCF_001280925.1_ASM128092v1 Hong 2013
	GCF_001307175.1_ASM130717v1	ST14	SAMN04044480	Klebsiella pneumoniae	2013	Korea	Human	GCF_001307175.1_ASM130717v1 Korea 2013
	GCF_001316565.3_ASM131656v3	ST101	SAMN04011426	Klebsiella pneumoniae subsp. pneumoniae	0	South Africa	Human	GCF_001316565.3_ASM131656v3 South Africa 0
	GCF_001455995.1_MS6671.v1	ST147	SAMEA3257677	Klebsiella pneumoniae	0	United Arab Emirates	Human	GCF_001455995.1_MS6671.v1 United Arab Emirates 0
	GCF_001456055.3_ASM145605v3	ST278	SAMN04168649	Klebsiella pneumoniae	2013	Canada	Human	GCF_001456055.3_ASM145605v3 Canada 2013
	GCF_001456095.3_ASM145609v3	ST278	SAMN04168654	Klebsiella pneumoniae	2013	Canada	Human	GCF_001456095.3_ASM145609v3 Canada 2013
	GCF_001456135.1_ASM145613v1	ST941	SAMN03733725	Klebsiella pneumoniae	2010	USA	Human	GCF_001456135.1_ASM145613v1 USA 2010
	GCF_001482345.1_ASM148234v1	ST111	SAMN04357099	Klebsiella pneumoniae	2014	China	NA	GCF_001482345.1_ASM148234v1 China 2014
	GCF_001521895.1_ASM152189v1	ST14	SAMN04421276	Klebsiella pneumoniae subsp. pneumoniae	2014	China	Human	GCF_001521895.1_ASM152189v1 China 2014
	GCF_001529935.1_ASM152993v1	ST23	SAMN04377968	Klebsiella pneumoniae subsp. pneumoniae	2015	China	Human	GCF_001529935.1_ASM152993v1 China 2015
	GCF_001530015.1_ASM153001v1	ST374	SAMN04377969	Klebsiella pneumoniae subsp. pneumoniae	2014	China	Human	GCF_001530015.1_ASM153001v1 China 2014
	GCF_001596075.2_ASM159607v2	ST489	SAMN04382091	Klebsiella quasipneumoniae	1994	USA	Human	GCF_001596075.2_ASM159607v2 USA 1994
	GCF_001611055.1_ASM161105v1	ST383	SAMN04087461	Klebsiella pneumoniae subsp. pneumoniae	2011	Greece	Human	GCF_001611055.1_ASM161105v1 Greece 2011
	GCF_001611095.1_ASM161109v1	ST383	SAMN04087462	Klebsiella pneumoniae subsp. pneumoniae	2013	Greece	Human	GCF_001611095.1_ASM161109v1 Greece 2013
	GCF_001644765.1_ASM164476v1	ST147	SAMN04917370	Klebsiella pneumoniae	2015	United Arab Emirates	Human	GCF_001644765.1_ASM164476v1 United Arab Emirates 2015
	GCF_001646625.1_ASM164662v1	ST1536	SAMN04992856	Klebsiella pneumoniae	2014	China	Human	GCF_001646625.1_ASM164662v1 China 2014
	GCF_001648215.1_ASM164821v1	ST147	SAMN03455970	Klebsiella pneumoniae	2014	USA	NA	GCF_001648215.1_ASM164821v1 USA 2014
	GCF_001663195.1_ASM166319v1	ST15	SAMN05188406	Klebsiella pneumoniae	2015	China	Human	GCF_001663195.1_ASM166319v1 China 2015
	GCF_001663295.1_ASM166329v1	ST37	SAMN03455930	Klebsiella pneumoniae	2014	USA	NA	GCF_001663295.1_ASM166329v1 USA 2014
	GCF_001663435.1_ASM166343v1	ST273	SAMN03455975	Klebsiella pneumoniae	2013	USA	NA	GCF_001663435.1_ASM166343v1 USA 2013
	GCF_001663455.1_ASM166345v1	ST514-2LV	SAMN03455976	Klebsiella pneumoniae	2014	USA	NA	GCF_001663455.1_ASM166345v1 USA 2014
	GCF_001675125.1_ASM167512v1	ST258	SAMN03701676	Klebsiella pneumoniae	2013	USA	NA	GCF_001675125.1_ASM167512v1 USA 2013
	GCF_001676825.1_ASM167682v1	ST1536	SAMN05170048	Klebsiella pneumoniae	2014	China	NA	GCF_001676825.1_ASM167682v1 China 2014
	GCF_001701425.2_ASM170142v2	ST147	NA	NA	0	NA	NA	GCF_001701425.2_ASM170142v2 NA 0
	GCF_001701835.2_ASM170183v2	ST11	NA	NA	0	NA	NA	GCF_001701835.2_ASM170183v2 NA 0
	GCF_001701845.2_ASM170184v2	ST258	NA	NA	0	NA	NA	GCF_001701845.2_ASM170184v2 NA 0
	GCF_001702045.2_ASM170204v2	ST258	NA	NA	0	NA	NA	GCF_001702045.2_ASM170204v2 NA 0
	GCF_001704235.1_ASM170423v1	ST34	SAMN04448219	Klebsiella pneumoniae	2010	USA	Human	GCF_001704235.1_ASM170423v1 USA 2010
	GCF_001705385.1_ASM170538v1	ST512	SAMN05149976	Klebsiella pneumoniae	2010	Switzerland	Human	GCF_001705385.1_ASM170538v1 Switzerland 2010
	GCF_001708225.1_ASM170822v1	ST23	SAMN05425526	Klebsiella pneumoniae	2006	Taiwan	Human	GCF_001708225.1_ASM170822v1 Taiwan 2006
	GCF_001708245.1_ASM170824v1	ST23	SAMN05425525	Klebsiella pneumoniae	2006	Taiwan	Human	GCF_001708245.1_ASM170824v1 Taiwan 2006
	GCF_001709275.1_ASM170927v1	ST14	SAMN04448229	Klebsiella pneumoniae	2013	USA	Human	GCF_001709275.1_ASM170927v1 USA 2013
	GCF_001709295.1_ASM170929v1	ST14	SAMN04448241	Klebsiella pneumoniae	2014	USA	Human	GCF_001709295.1_ASM170929v1 USA 2014
	GCF_001721725.1_ASM172172v1	ST16	SAMN04008891	Klebsiella pneumoniae	2014	USA	Human	GCF_001721725.1_ASM172172v1 USA 2014
	GCF_001741545.1_ASM174154v1	ST16	SAMN04008893	Klebsiella pneumoniae	2015	USA	Human	GCF_001741545.1_ASM174154v1 USA 2015
	GCF_001741665.1_ASM174166v1	ST16	SAMN04008892	Klebsiella pneumoniae	2014	USA	Human	GCF_001741665.1_ASM174166v1 USA 2014
	GCF_001746535.1_ASM174653v1	ST147	SAMN04087463	Klebsiella pneumoniae subsp. pneumoniae	2013	Greece	Human	GCF_001746535.1_ASM174653v1 Greece 2013
	GCF_001750805.1_ASM175080v1	ST15	SAMN05786944	Klebsiella pneumoniae	2007	Taiwan	Human	GCF_001750805.1_ASM175080v1 Taiwan 2007
	GCF_001855315.1_ASM185531v1	ST147	SAMN03770912	Klebsiella pneumoniae	2014	Singapore	Human	GCF_001855315.1_ASM185531v1 Singapore 2014
	GCF_001870165.1_ASM187016v1	ST45	SAMN03024573	Klebsiella pneumoniae	2007	USA	Human	GCF_001870165.1_ASM187016v1 USA 2007
	GCF_001885255.2_ASM188525v2	ST147	SAMN05412444	Klebsiella pneumoniae	2013	Germany	Human	GCF_001885255.2_ASM188525v2 Germany 2013
	GCF_001887995.2_ASM188799v2	ST1	NA	NA	0	NA	NA	GCF_001887995.2_ASM188799v2 NA 0
	GCF_001902195.1_ASM190219v1	ST258	SAMN06067846	Klebsiella pneumoniae	2013	USA	Human	GCF_001902195.1_ASM190219v1 USA 2013
	GCF_001902215.1_ASM190221v1	ST258	SAMN06067845	Klebsiella pneumoniae	2012	USA	Human	GCF_001902215.1_ASM190221v1 USA 2012
	GCF_001902235.1_ASM190223v1	ST258	SAMN06067844	Klebsiella pneumoniae	2012	USA	Human	GCF_001902235.1_ASM190223v1 USA 2012
	GCF_001902255.1_ASM190225v1	ST258	SAMN03733793	Klebsiella pneumoniae	2011	USA	Human	GCF_001902255.1_ASM190225v1 USA 2011
	GCF_001902335.1_ASM190233v1	ST23	SAMN05412805	Klebsiella pneumoniae	2014	Germany	Human	GCF_001902335.1_ASM190233v1 Germany 2014
	GCF_001902355.1_ASM190235v1	ST395	SAMN05412811	Klebsiella pneumoniae	2015	Germany	Human	GCF_001902355.1_ASM190235v1 Germany 2015
	GCF_001902395.1_ASM190239v1	ST15	SAMN05412810	Klebsiella pneumoniae	2014	Germany	Human	GCF_001902395.1_ASM190239v1 Germany 2014
	GCF_001902415.1_ASM190241v1	ST11	SAMN05412453	Klebsiella pneumoniae	2013	Germany	Human	GCF_001902415.1_ASM190241v1 Germany 2013
	GCF_001902435.1_ASM190243v1	ST101	SAMN05412455	Klebsiella pneumoniae	2013	Germany	Human	GCF_001902435.1_ASM190243v1 Germany 2013
	GCF_001902475.1_ASM190247v1	ST11	SAMN06109054	Klebsiella pneumoniae	2015	China	Human	GCF_001902475.1_ASM190247v1 China 2015
	GCF_001902515.1_ASM190251v1	ST101	SAMN05412456	Klebsiella pneumoniae	2013	Germany	Human	GCF_001902515.1_ASM190251v1 Germany 2013
	GCF_001902535.1_ASM190253v1	ST340	SAMN03733765	Klebsiella pneumoniae	2011	USA	Human	GCF_001902535.1_ASM190253v1 USA 2011
	GCF_001908515.1_ASM190851v1	ST244	SAMN03024576	Klebsiella pneumoniae	2008	USA	Human	GCF_001908515.1_ASM190851v1 USA 2008
	GCF_001908595.1_ASM190859v1	ST147	SAMN05412458	Klebsiella pneumoniae	2014	Germany	Human	GCF_001908595.1_ASM190859v1 Germany 2014
	GCF_001908625.1_ASM190862v1	ST147	SAMN05412797	Klebsiella pneumoniae	2014	Germany	Human	GCF_001908625.1_ASM190862v1 Germany 2014
	GCF_001908655.1_ASM190865v1	ST147	SAMN05412802	Klebsiella pneumoniae	2014	Germany	Human	GCF_001908655.1_ASM190865v1 Germany 2014
	GCF_001908675.1_ASM190867v1	ST147	SAMN05412803	Klebsiella pneumoniae	2014	Germany	Human	GCF_001908675.1_ASM190867v1 Germany 2014
	GCF_001908695.1_ASM190869v1	ST147	SAMN05412804	Klebsiella pneumoniae	2014	Germany	Human	GCF_001908695.1_ASM190869v1 Germany 2014
	GCF_001908715.1_ASM190871v1	ST340	SAMN03024585	Klebsiella pneumoniae	2010	USA	Human	GCF_001908715.1_ASM190871v1 USA 2010
	GCF_001908875.1_ASM190887v1	ST147	SAMN05412459	Klebsiella pneumoniae	2014	Germany	Human	GCF_001908875.1_ASM190887v1 Germany 2014
	GCF_001908895.1_ASM190889v1	ST11	SAMN05412457	Klebsiella pneumoniae	2014	Germany	Human	GCF_001908895.1_ASM190889v1 Germany 2014
	GCF_001913175.1_ASM191317v1	ST101	SAMN05412452	Klebsiella pneumoniae	2013	Germany	Human	GCF_001913175.1_ASM191317v1 Germany 2013
	GCF_001922465.1_ASM192246v1	ST11	SAMN04014890	Klebsiella pneumoniae	2015	USA	NA	GCF_001922465.1_ASM192246v1 USA 2015
	GCF_001936035.1_ASM193603v1	ST505	SAMN03455977	Klebsiella pneumoniae	2017	USA	Human	GCF_001936035.1_ASM193603v1 USA 2017
	GCF_001939885.2_ASM193988v2	ST485	SAMN05928590	Klebsiella pneumoniae	2015	China	Human	GCF_001939885.2_ASM193988v2 China 2015
	GCF_001952835.1_ASM195283v1	ST2424-1LV	SAMN06216564	Klebsiella pneumoniae	2004	Taiwan	Human	GCF_001952835.1_ASM195283v1 Taiwan 2004
	GCF_001952875.1_ASM195287v1	ST392	SAMN04889855	Klebsiella pneumoniae	0	USA	Human	GCF_001952875.1_ASM195287v1 USA 0
	GCF_001952895.1_ASM195289v1	ST340	SAMN04889856	Klebsiella pneumoniae	0	USA	Human	GCF_001952895.1_ASM195289v1 USA 0
	GCF_001952915.1_ASM195291v1	ST258	SAMN04889857	Klebsiella pneumoniae	0	USA	Human	GCF_001952915.1_ASM195291v1 USA 0
	GCF_001956965.1_ASM195696v1	ST147	SAMN05412796	Klebsiella pneumoniae	2014	Germany	Human	GCF_001956965.1_ASM195696v1 Germany 2014
	GCF_002009075.1_ASM200907v1	ST11	SAMN04457965	Klebsiella pneumoniae	2015	USA	Human	GCF_002009075.1_ASM200907v1 USA 2015
	GCF_002055765.1_ASM205576v1	ST234	SAMN04014958	Klebsiella pneumoniae	2015	USA	Human	GCF_002055765.1_ASM205576v1 USA 2015
	GCF_002055855.1_ASM205585v1	ST14	SAMN04014909	Klebsiella pneumoniae	2015	USA	Human	GCF_002055855.1_ASM205585v1 USA 2015
	GCF_002056385.1_ASM205638v1	ST258	SAMN04014956	Klebsiella pneumoniae	2015	USA	Human	GCF_002056385.1_ASM205638v1 USA 2015
	GCF_002056475.1_ASM205647v1	ST258	SAMN04014939	Klebsiella pneumoniae	2015	USA	Human	GCF_002056475.1_ASM205647v1 USA 2015
	GCF_002113865.1_ASM211386v1	ST11	NA	NA	0	NA	NA	GCF_002113865.1_ASM211386v1 NA 0
	GCF_002116885.1_ASM211688v1	ST86	SAMN04621179	Klebsiella pneumoniae	2015	USA	Human	GCF_002116885.1_ASM211688v1 USA 2015
	GCF_002156725.1_ASM215672v1	ST258	SAMN06701573	Klebsiella pneumoniae	2004	USA	Human	GCF_002156725.1_ASM215672v1 USA 2004
	GCF_002156745.1_ASM215674v1	ST37	SAMN06438459	Klebsiella pneumoniae	2014	USA	Human	GCF_002156745.1_ASM215674v1 USA 2014
	GCF_002156785.1_ASM215678v1	ST14	SAMN06437491	Klebsiella pneumoniae	2012	USA	Human	GCF_002156785.1_ASM215678v1 USA 2012
	GCF_002163895.1_ASM216389v1	ST23	SAMN06200334	Klebsiella pneumoniae subsp. pneumoniae	2015	China	Human	GCF_002163895.1_ASM216389v1 China 2015
	GCF_002164855.2_ASM216485v2	ST11	NA	NA	0	NA	NA	GCF_002164855.2_ASM216485v2 NA 0
	GCF_002180075.1_ASM218007v1	ST258	SAMN04014888	Klebsiella pneumoniae	2015	USA	Human	GCF_002180075.1_ASM218007v1 USA 2015
	GCF_002180155.1_ASM218015v1	ST258	SAMN04014953	Klebsiella pneumoniae	2015	USA	Human	GCF_002180155.1_ASM218015v1 USA 2015
	GCF_002180175.1_ASM218017v1	ST11	SAMN04014987	Klebsiella pneumoniae	2015	USA	Human	GCF_002180175.1_ASM218017v1 USA 2015
	GCF_002180255.1_ASM218025v1	ST163	SAMN04014999	Klebsiella pneumoniae	2015	USA	Human	GCF_002180255.1_ASM218025v1 USA 2015
	GCF_002180295.1_ASM218029v1	ST258	SAMN04014970	Klebsiella pneumoniae	2015	USA	Human	GCF_002180295.1_ASM218029v1 USA 2015
	GCF_002180315.1_ASM218031v1	ST14	SAMN04014984	Klebsiella pneumoniae	2015	USA	Human	GCF_002180315.1_ASM218031v1 USA 2015
	GCF_002187935.3_ASM218793v3	ST476	NA	NA	0	NA	NA	GCF_002187935.3_ASM218793v3 NA 0
	GCF_002192315.1_ASM219231v1	ST45	SAMN04014967	Klebsiella pneumoniae	2015	USA	Human	GCF_002192315.1_ASM219231v1 USA 2015
	GCF_002192335.1_ASM219233v1	ST258	SAMN04014954	Klebsiella pneumoniae	2015	USA	Human	GCF_002192335.1_ASM219233v1 USA 2015
	GCF_002192375.1_ASM219237v1	ST147	SAMN04014979	Klebsiella pneumoniae	2015	USA	Human	GCF_002192375.1_ASM219237v1 USA 2015
	GCF_002197225.1_ASM219722v1	ST258	SAMN04014961	Klebsiella pneumoniae	2015	USA	Human	GCF_002197225.1_ASM219722v1 USA 2015
	GCF_002197505.1_ASM219750v1	ST258	SAMN04014966	Klebsiella pneumoniae	2015	USA	Human	GCF_002197505.1_ASM219750v1 USA 2015
	GCF_002202195.1_ASM220219v1	ST37	SAMN04014980	Klebsiella pneumoniae	2015	USA	Human	GCF_002202195.1_ASM220219v1 USA 2015
	GCF_002202215.1_ASM220221v1	ST147	SAMN04014986	Klebsiella pneumoniae	2015	USA	Human	GCF_002202215.1_ASM220221v1 USA 2015
	GCF_002202235.1_ASM220223v1	ST147	SAMN04014993	Klebsiella pneumoniae	2015	USA	Human	GCF_002202235.1_ASM220223v1 USA 2015
	GCF_002202255.1_ASM220225v1	ST11	SAMN04014989	Klebsiella pneumoniae	2015	USA	Human	GCF_002202255.1_ASM220225v1 USA 2015
	GCF_002202275.1_ASM220227v1	ST1161	SAMN04014948	Klebsiella pneumoniae	2015	USA	Human	GCF_002202275.1_ASM220227v1 USA 2015
	GCF_002209405.1_ASM220940v1	ST15	SAMN07187263	Klebsiella pneumoniae	2017	China	Human	GCF_002209405.1_ASM220940v1 China 2017
	GCF_002211905.1_ASM221190v1	ST15	SAMN07265011	Klebsiella pneumoniae	2016	USA	Human	GCF_002211905.1_ASM221190v1 USA 2016
	GCF_002239895.2_ASM223989v2	ST476	NA	NA	0	NA	NA	GCF_002239895.2_ASM223989v2 NA 0
	GCF_002240295.1_ASM224029v1	ST480-2LV	SAMN04436401	Klebsiella quasipneumoniae	2013	China	Panda	GCF_002240295.1_ASM224029v1 China 2013
	GCF_002240315.1_ASM224031v1	ST480-2LV	NA	NA	0	NA	NA	GCF_002240315.1_ASM224031v1 NA 0
	GCF_002240335.1_ASM224033v1	ST480-2LV	NA	NA	0	NA	NA	GCF_002240335.1_ASM224033v1 NA 0
	GCF_002243445.1_ASM224344v1	ST258	SAMN07419044	Klebsiella pneumoniae	2009	France	Human	GCF_002243445.1_ASM224344v1 France 2009
	GCF_002257765.2_ASM225776v2	ST11	NA	NA	0	NA	NA	GCF_002257765.2_ASM225776v2 NA 0
	GCF_002269295.1_ASM226929v1	ST11	SAMN07508215	Klebsiella pneumoniae	2014	China	Human	GCF_002269295.1_ASM226929v1 China 2014
	GCF_002278055.1_ASM227805v1	ST11	SAMN07484315	Klebsiella pneumoniae	2013	China	Human	GCF_002278055.1_ASM227805v1 China 2013
	GCF_002587165.1_ASM258716v1	ST11	SAMN07312488	Klebsiella pneumoniae	2013	Canada	Missing	GCF_002587165.1_ASM258716v1 Canada 2013
	GCF_002587885.1_ASM258788v1	ST340	SAMN07312490	Klebsiella pneumoniae	2014	Canada	Missing	GCF_002587885.1_ASM258788v1 Canada 2014
	GCF_002591075.1_ASM259107v1	ST147	SAMN07312483	Klebsiella pneumoniae	2014	Canada	Missing	GCF_002591075.1_ASM259107v1 Canada 2014
	GCF_002741685.1_ASM274168v1	ST340	SAMN06112197	Klebsiella pneumoniae	2013	Australia	Human	GCF_002741685.1_ASM274168v1 Australia 2013
	GCF_002752775.1_ASM275277v1	ST29	SAMEA3357223	Klebsiella pneumoniae	2015	Australia	Human	GCF_002752775.1_ASM275277v1 Australia 2015
	GCF_002752815.1_ASM275281v1	ST29	SAMEA3357193	Klebsiella pneumoniae	2015	Australia	Human	GCF_002752815.1_ASM275281v1 Australia 2015
	GCF_002752905.1_ASM275290v1	ST323	SAMEA3357328	Klebsiella pneumoniae	2015	Australia	Human	GCF_002752905.1_ASM275290v1 Australia 2015
	GCF_002752955.1_ASM275295v1	ST45	SAMN07792166	Klebsiella pneumoniae	2017	Thailand	Human	GCF_002752955.1_ASM275295v1 Thailand 2017
	GCF_002752975.1_ASM275297v1	ST340	SAMEA3357272	Klebsiella pneumoniae	2015	Australia	Human	GCF_002752975.1_ASM275297v1 Australia 2015
	GCF_002752995.1_ASM275299v1	ST37	SAMEA3357010	Klebsiella pneumoniae	2015	Australia	Human	GCF_002752995.1_ASM275299v1 Australia 2015
	GCF_002753015.1_ASM275301v1	ST323	SAMEA3357405	Klebsiella pneumoniae	2015	Australia	Human	GCF_002753015.1_ASM275301v1 Australia 2015
	GCF_002753035.1_ASM275303v1	ST323	SAMEA3357381	Klebsiella pneumoniae	2015	Australia	Human	GCF_002753035.1_ASM275303v1 Australia 2015
	GCF_002753055.1_ASM275305v1	ST340	SAMEA3357080	Klebsiella pneumoniae	2015	Australia	Human	GCF_002753055.1_ASM275305v1 Australia 2015
	GCF_002753075.1_ASM275307v1	ST340	SAMEA3357077	Klebsiella pneumoniae	2015	Australia	Human	GCF_002753075.1_ASM275307v1 Australia 2015
	GCF_002753165.1_ASM275316v1	ST340	SAMN07211282	Klebsiella pneumoniae	2015	Australia	Human	GCF_002753165.1_ASM275316v1 Australia 2015
	GCF_002753355.1_ASM275335v1	ST37	SAMEA3357043	Klebsiella pneumoniae	2015	Australia	Human	GCF_002753355.1_ASM275335v1 Australia 2015
	GCF_002753375.1_ASM275337v1	ST37	SAMEA3357374	Klebsiella pneumoniae	2015	Australia	Human	GCF_002753375.1_ASM275337v1 Australia 2015
	GCF_002753405.1_ASM275340v1	ST340	SAMN07211279	Klebsiella pneumoniae	2015	Australia	Human	GCF_002753405.1_ASM275340v1 Australia 2015
	GCF_002753555.1_ASM275355v1	ST340	SAMN07211280	Klebsiella pneumoniae	2015	Australia	Human	GCF_002753555.1_ASM275355v1 Australia 2015
	GCF_002753605.1_ASM275360v1	ST340	SAMEA3357268	Klebsiella pneumoniae	2015	Australia	Human	GCF_002753605.1_ASM275360v1 Australia 2015
	GCF_002754835.1_ASM275483v1	ST323	SAMEA3357325	Klebsiella pneumoniae	2015	Australia	Human	GCF_002754835.1_ASM275483v1 Australia 2015
	GCF_002761315.1_ASM276131v1	ST23	SAMN05231874	Klebsiella pneumoniae	2007	China	Human	GCF_002761315.1_ASM276131v1 China 2007
	GCF_002761515.1_ASM276151v1	ST659	SAMN04244588	Klebsiella pneumoniae subsp. pneumoniae	2010	China	Human	GCF_002761515.1_ASM276151v1 China 2010
	GCF_002786755.1_ASM278675v1	ST147	SAMN07944237	Klebsiella pneumoniae	2014	South Korea	Human	GCF_002786755.1_ASM278675v1 South Korea 2014
	GCF_002787755.1_ASM278775v1	ST147	SAMN07944238	Klebsiella pneumoniae	2015	South Korea	Human	GCF_002787755.1_ASM278775v1 South Korea 2015
	GCF_002811305.2_ASM281130v2	ST11	NA	NA	0	NA	NA	GCF_002811305.2_ASM281130v2 NA 0
	GCF_002812365.1_ASM281236v1	ST258	SAMN07503096	Klebsiella pneumoniae	2014	Australia	Human	GCF_002812365.1_ASM281236v1 Australia 2014
	GCF_002812385.1_ASM281238v1	ST258	SAMN07503088	Klebsiella pneumoniae	2014	Australia	Human	GCF_002812385.1_ASM281238v1 Australia 2014
	GCF_002812665.1_ASM281266v1	ST258	SAMN08111037	Klebsiella pneumoniae	2011	USA	Human	GCF_002812665.1_ASM281266v1 USA 2011
	GCF_002813595.1_ASM281359v1	ST23	SAMN06112188	Klebsiella pneumoniae	0	Singapore	Human	GCF_002813595.1_ASM281359v1 Singapore 0
	GCF_002814015.1_ASM281401v1	ST37	SAMN05231873	Klebsiella pneumoniae	2008	China	Human	GCF_002814015.1_ASM281401v1 China 2008
	GCF_002833425.1_ASM283342v1	ST307	SAMN08133261	Klebsiella pneumoniae	2016	USA	Human	GCF_002833425.1_ASM283342v1 USA 2016
	GCF_002833445.1_ASM283344v1	ST307	SAMN08133260	Klebsiella pneumoniae	2016	USA	Human	GCF_002833445.1_ASM283344v1 USA 2016
	GCF_002833465.1_ASM283346v1	ST307	SAMN08133262	Klebsiella pneumoniae	2016	USA	Human	GCF_002833465.1_ASM283346v1 USA 2016
	GCF_002848545.1_ASM284854v1	ST11	SAMN08180551	Klebsiella pneumoniae	2017	China	Human	GCF_002848545.1_ASM284854v1 China 2017
	GCF_002848565.1_ASM284856v1	ST11	SAMN08180799	Klebsiella pneumoniae	2008	China	Human	GCF_002848565.1_ASM284856v1 China 2008
	GCF_002848585.1_ASM284858v1	ST11	SAMN08180798	Klebsiella pneumoniae	2016	China	Human	GCF_002848585.1_ASM284858v1 China 2016
	GCF_002848605.1_ASM284860v1	ST147	NA	NA	0	NA	NA	GCF_002848605.1_ASM284860v1 NA 0
	GCF_002850275.3_ASM285027v3	ST111	NA	NA	0	NA	NA	GCF_002850275.3_ASM285027v3 NA 0
	GCF_002852365.2_ASM285236v2	ST11	NA	NA	0	NA	NA	GCF_002852365.2_ASM285236v2 NA 0
	GCF_002852995.3_ASM285299v3	ST1	NA	NA	0	NA	NA	GCF_002852995.3_ASM285299v3 NA 0
	GCF_002853475.2_ASM285347v2	ST1	NA	NA	0	NA	NA	GCF_002853475.2_ASM285347v2 NA 0
	GCF_002893825.1_ASM289382v1	ST11	SAMN08166690	Klebsiella pneumoniae subsp. pneumoniae	2015	China	Human	GCF_002893825.1_ASM289382v1 China 2015
	GCF_002903005.1_ASM290300v1	ST252	SAMN06040389	Klebsiella pneumoniae	2016	USA	NA	GCF_002903005.1_ASM290300v1 USA 2016
	GCF_002903025.1_ASM290302v1	ST359	SAMN06040388	Klebsiella pneumoniae	2016	USA	NA	GCF_002903025.1_ASM290302v1 USA 2016
	GCF_002918585.2_ASM291858v2	ST340	NA	NA	0	NA	NA	GCF_002918585.2_ASM291858v2 NA 0
	GCF_002935085.1_ASM293508v1	ST252	SAMN06040387	Klebsiella pneumoniae	2016	USA	NA	GCF_002935085.1_ASM293508v1 USA 2016
	GCF_002944845.1_ASM294484v1	ST86	SAMN08455837	Klebsiella pneumoniae	2016	China	Human	GCF_002944845.1_ASM294484v1 China 2016
	GCF_002948565.1_ASM294856v1	ST14	SAMN04014907	Klebsiella pneumoniae	2015	USA	Human	GCF_002948565.1_ASM294856v1 USA 2015
	GCF_002951555.1_ASM295155v1	ST437	SAMN06173548	Klebsiella pneumoniae subsp. pneumoniae	2009	Brazil	Human	GCF_002951555.1_ASM295155v1 Brazil 2009
	GCF_002951595.1_ASM295159v1	ST437	SAMN06173549	Klebsiella pneumoniae subsp. pneumoniae	2009	Brazil	Human	GCF_002951595.1_ASM295159v1 Brazil 2009
	GCF_002951635.1_ASM295163v1	ST13	SAMN03996301	Klebsiella pneumoniae	2014	USA	NA	GCF_002951635.1_ASM295163v1 USA 2014
	GCF_002953295.1_ASM295329v1	ST489	SAMN03996259	Klebsiella quasipneumoniae	0	USA	NA	GCF_002953295.1_ASM295329v1 USA 0
	GCF_002966875.1_ASM296687v1	ST34	NA	NA	0	NA	NA	GCF_002966875.1_ASM296687v1 NA 0
	GCF_002968475.1_ASM296847v1	ST258	SAMN07291506	Klebsiella pneumoniae	2016	USA	Human	GCF_002968475.1_ASM296847v1 USA 2016
	GCF_002968495.1_ASM296849v1	ST258	SAMN07291504	Klebsiella pneumoniae	2016	USA	Human	GCF_002968495.1_ASM296849v1 USA 2016
	GCF_002970375.3_ASM297037v3	ST395	NA	NA	0	NA	NA	GCF_002970375.3_ASM297037v3 NA 0
	GCF_002970895.1_ASM297089v1	ST23	SAMN08582315	Klebsiella pneumoniae	2008	China	Human	GCF_002970895.1_ASM297089v1 China 2008
	GCF_003006175.1_ASM300617v1	ST147	SAMN05908511	Klebsiella pneumoniae	2015	Pakistan	Human	GCF_003006175.1_ASM300617v1 Pakistan 2015
	GCF_003010735.1_ASM301073v1	ST2167	SAMN04014937	Klebsiella pneumoniae subsp. ozaenae	2015	USA	Human	GCF_003010735.1_ASM301073v1 USA 2015
	GCF_003030045.1_ASM303004v1	ST512	SAMN08663443	Klebsiella pneumoniae	2013	Denmark	Human	GCF_003030045.1_ASM303004v1 Denmark 2013
	GCF_003030145.1_ASM303014v1	ST15	SAMN08663449	Klebsiella pneumoniae	2012	Germany	Human	GCF_003030145.1_ASM303014v1 Germany 2012
	GCF_003031325.1_ASM303132v1	ST15	SAMN08022168	Klebsiella pneumoniae	2016	Thailand	Human	GCF_003031325.1_ASM303132v1 Thailand 2016
	GCF_003031345.1_ASM303134v1	ST147	SAMN08026708	Klebsiella pneumoniae	2016	Thailand	Human	GCF_003031345.1_ASM303134v1 Thailand 2016
	GCF_003031505.1_ASM303150v1	ST258	NA	NA	0	NA	NA	GCF_003031505.1_ASM303150v1 NA 0
	GCF_003037005.2_ASM303700v2	ST11	NA	NA	0	NA	NA	GCF_003037005.2_ASM303700v2 NA 0
	GCF_003037615.2_ASM303761v2	ST48	SAMN08027262	Klebsiella pneumoniae subsp. pneumoniae	2017	China	Human	GCF_003037615.2_ASM303761v2 China 2017
	GCF_003054385.1_ASM305438v1	ST15	NA	NA	0	NA	NA	GCF_003054385.1_ASM305438v1 NA 0
	GCF_003069525.1_ASM306952v1	ST14	SAMN04014994	Klebsiella pneumoniae	2015	USA	Human	GCF_003069525.1_ASM306952v1 USA 2015
	GCF_003071305.1_ASM307130v1	ST34	SAMN04014982	Klebsiella pneumoniae	2015	USA	Human	GCF_003071305.1_ASM307130v1 USA 2015
	GCF_003073235.1_ASM307323v1	ST16	SAMN07792096	Klebsiella pneumoniae	2017	Thailand	Human	GCF_003073235.1_ASM307323v1 Thailand 2017
	GCF_003073315.1_ASM307331v1	ST34	SAMN04014983	Klebsiella pneumoniae	2015	USA	Human	GCF_003073315.1_ASM307331v1 USA 2015
	GCF_003073335.1_ASM307333v1	ST11	SAMN04014920	Klebsiella pneumoniae	2015	USA	Human	GCF_003073335.1_ASM307333v1 USA 2015
	GCF_003073675.1_ASM307367v1	ST512	SAMN07291531	Klebsiella pneumoniae	2016	USA	Human	GCF_003073675.1_ASM307367v1 USA 2016
	GCF_003074015.1_ASM307401v1	ST15	SAMN07291519	Klebsiella pneumoniae	2016	USA	Human	GCF_003074015.1_ASM307401v1 USA 2016
	GCF_003076555.1_ASM307655v1	ST307	SAMN08391417	Klebsiella pneumoniae	2009	Iran	Human	GCF_003076555.1_ASM307655v1 Iran 2009
	GCF_003146635.1_ASM314663v1	ST196	SAMN09205485	Klebsiella quasipneumoniae	2014	USA	NA	GCF_003146635.1_ASM314663v1 USA 2014
	GCF_003146655.1_ASM314665v1	ST196	SAMN09205469	Klebsiella quasipneumoniae	2013	USA	Human	GCF_003146655.1_ASM314665v1 USA 2013
	GCF_003146685.1_ASM314668v1	ST196	SAMN09205495	Klebsiella quasipneumoniae	2014	USA	NA	GCF_003146685.1_ASM314668v1 USA 2014
	GCF_003181055.1_ASM318105v1	ST147	SAMN09245749	Klebsiella pneumoniae	0	Sweden	Human	GCF_003181055.1_ASM318105v1 Sweden 0
	GCF_003181095.1_ASM318109v1	ST16	SAMN09245752	Klebsiella pneumoniae	0	Sweden	Human	GCF_003181095.1_ASM318109v1 Sweden 0
	GCF_003181135.1_ASM318113v1	ST16	SAMN09245753	Klebsiella pneumoniae	0	Sweden	Human	GCF_003181135.1_ASM318113v1 Sweden 0
	GCF_003181175.1_ASM318117v1	ST489	SAMN09245763	Klebsiella quasipneumoniae subsp. similipneumoniae	1994	USA	Human	GCF_003181175.1_ASM318117v1 USA 1994
	GCF_003186535.1_ASM318653v1	ST983	SAMN05774083	Klebsiella pneumoniae	2016	USA	Human	GCF_003186535.1_ASM318653v1 USA 2016
	GCF_003194285.1_ASM319428v1	ST147	SAMN07602587	Klebsiella pneumoniae	2012	Sweden	Human	GCF_003194285.1_ASM319428v1 Sweden 2012
	GCF_003203435.1_ASM320343v1	ST11	SAMN07672549	Klebsiella pneumoniae	2014	Taiwan	Human	GCF_003203435.1_ASM320343v1 Taiwan 2014
	GCF_003204175.1_ASM320417v1	ST16	SAMN04014928	Klebsiella pneumoniae	2015	USA	Human	GCF_003204175.1_ASM320417v1 USA 2015
	GCF_003204465.1_ASM320446v1	ST34	SAMN04014981	Klebsiella pneumoniae	2015	USA	Human	GCF_003204465.1_ASM320446v1 USA 2015
	GCF_003261955.2_ASM326195v2	ST11	NA	NA	0	NA	NA	GCF_003261955.2_ASM326195v2 NA 0
	GCF_003267985.1_ASM326798v1	ST14	SAMN07373332	Klebsiella pneumoniae	2017	USA	Human	GCF_003267985.1_ASM326798v1 USA 2017
	GCF_003285145.1_ASM328514v1	ST1755	SAMN09476129	Klebsiella pneumoniae subsp. pneumoniae	2013	China	Human	GCF_003285145.1_ASM328514v1 China 2013
	GCF_003285165.1_ASM328516v1	ST196-2LV	SAMN09475282	Klebsiella quasipneumoniae subsp. quasipneumoniae	2014	China	Human	GCF_003285165.1_ASM328516v1 China 2014
	GCF_003286975.1_ASM328697v1	ST29	SAMN09476115	Klebsiella pneumoniae subsp. pneumoniae	2013	China	Human	GCF_003286975.1_ASM328697v1 China 2013
	GCF_003286995.1_ASM328699v1	ST1660	SAMN09487268	Klebsiella pneumoniae subsp. pneumoniae	2015	China	Human	GCF_003286995.1_ASM328699v1 China 2015
	GCF_003288375.1_ASM328837v1	ST258	SAMN07291505	Klebsiella pneumoniae	2016	USA	Human	GCF_003288375.1_ASM328837v1 USA 2016
	GCF_003330945.1_ASM333094v1	ST375	NA	NA	0	NA	NA	GCF_003330945.1_ASM333094v1 NA 0
	GCF_003367555.1_ASM336755v1	ST11	NA	NA	0	NA	NA	GCF_003367555.1_ASM336755v1 NA 0
	GCF_003368025.1_ASM336802v1	ST258	NA	NA	0	NA	NA	GCF_003368025.1_ASM336802v1 NA 0
	GCF_003408615.1_ASM340861v1	ST422	NA	NA	0	NA	NA	GCF_003408615.1_ASM340861v1 NA 0
	GCF_003428845.1_ASM342884v1	ST14	NA	NA	0	NA	NA	GCF_003428845.1_ASM342884v1 NA 0
	GCF_003429065.3_ASM342906v3	ST719	NA	NA	0	NA	NA	GCF_003429065.3_ASM342906v3 NA 0
	GCF_003429545.1_ASM342954v1	ST11	NA	NA	0	NA	NA	GCF_003429545.1_ASM342954v1 NA 0
	GCF_003432145.1_ASM343214v1	ST661	NA	NA	0	NA	NA	GCF_003432145.1_ASM343214v1 NA 0
	GCF_003432165.1_ASM343216v1	ST231	NA	NA	0	NA	NA	GCF_003432165.1_ASM343216v1 NA 0
	GCF_003432185.1_ASM343218v1	ST29	NA	NA	0	NA	NA	GCF_003432185.1_ASM343218v1 NA 0
	GCF_003432205.1_ASM343220v1	ST230	NA	NA	0	NA	NA	GCF_003432205.1_ASM343220v1 NA 0
	GCF_003432225.1_ASM343222v1	ST25	NA	NA	0	NA	NA	GCF_003432225.1_ASM343222v1 NA 0
	GCF_003432245.1_ASM343224v1	ST36	NA	NA	0	NA	NA	GCF_003432245.1_ASM343224v1 NA 0
	GCF_003432265.1_ASM343226v1	ST43	NA	NA	0	NA	NA	GCF_003432265.1_ASM343226v1 NA 0
	GCF_003432285.1_ASM343228v1	ST45	NA	NA	0	NA	NA	GCF_003432285.1_ASM343228v1 NA 0
	GCF_003432405.1_ASM343240v1	ST1	NA	NA	0	NA	NA	GCF_003432405.1_ASM343240v1 NA 0
	GCF_003443755.1_ASM344375v1	ST54	NA	NA	0	NA	NA	GCF_003443755.1_ASM344375v1 NA 0
	GCF_003443835.1_ASM344383v1	ST367	NA	NA	0	NA	NA	GCF_003443835.1_ASM344383v1 NA 0
	GCF_003571525.1_ASM357152v1	ST2938	NA	NA	0	NA	NA	GCF_003571525.1_ASM357152v1 NA 0
	GCF_003571545.1_ASM357154v1	ST101	NA	NA	0	NA	NA	GCF_003571545.1_ASM357154v1 NA 0
	GCF_003571585.1_ASM357158v1	ST36	NA	NA	0	NA	NA	GCF_003571585.1_ASM357158v1 NA 0
	GCF_003571605.1_ASM357160v1	ST16	NA	NA	0	NA	NA	GCF_003571605.1_ASM357160v1 NA 0
	GCF_003571645.1_ASM357164v1	ST2167-1LV	NA	NA	0	NA	NA	GCF_003571645.1_ASM357164v1 NA 0
	GCF_003571705.1_ASM357170v1	ST340	NA	NA	0	NA	NA	GCF_003571705.1_ASM357170v1 NA 0
	GCF_003571745.1_ASM357174v1	ST147	NA	NA	0	NA	NA	GCF_003571745.1_ASM357174v1 NA 0
	GCF_003574235.1_ASM357423v1	ST14	NA	NA	0	NA	NA	GCF_003574235.1_ASM357423v1 NA 0
	GCF_003574255.1_ASM357425v1	ST14	NA	NA	0	NA	NA	GCF_003574255.1_ASM357425v1 NA 0
	GCF_003574275.1_ASM357427v1	ST14	NA	NA	0	NA	NA	GCF_003574275.1_ASM357427v1 NA 0
	GCF_003584585.1_ASM358458v1	ST11	NA	NA	0	NA	NA	GCF_003584585.1_ASM358458v1 NA 0
	GCF_003590665.1_ASM359066v1	ST253	NA	NA	0	NA	NA	GCF_003590665.1_ASM359066v1 NA 0
	GCF_003597695.1_ASM359769v1	ST307	NA	NA	0	NA	NA	GCF_003597695.1_ASM359769v1 NA 0
	GCF_003597715.1_ASM359771v1	ST307	NA	NA	0	NA	NA	GCF_003597715.1_ASM359771v1 NA 0
	GCF_003597735.1_ASM359773v1	ST307	NA	NA	0	NA	NA	GCF_003597735.1_ASM359773v1 NA 0
	GCF_003597755.1_ASM359775v1	ST307	NA	NA	0	NA	NA	GCF_003597755.1_ASM359775v1 NA 0
	GCF_003660185.1_ASM366018v1	ST105	NA	NA	0	NA	NA	GCF_003660185.1_ASM366018v1 NA 0
	GCF_003660205.1_ASM366020v1	ST91	NA	NA	0	NA	NA	GCF_003660205.1_ASM366020v1 NA 0
	GCF_003692695.1_ASM369269v1	ST22-2LV	NA	NA	0	NA	NA	GCF_003692695.1_ASM369269v1 NA 0
	GCF_003711065.1_ASM371106v1	ST11	NA	NA	0	NA	NA	GCF_003711065.1_ASM371106v1 NA 0
	GCF_003790485.1_ASM379048v1	ST1685	NA	NA	0	NA	NA	GCF_003790485.1_ASM379048v1 NA 0
	GCF_003812085.1_ASM381208v1	ST252	NA	NA	0	NA	NA	GCF_003812085.1_ASM381208v1 NA 0
	GCF_003812105.1_ASM381210v1	ST25	NA	NA	0	NA	NA	GCF_003812105.1_ASM381210v1 NA 0
	GCF_003850165.1_ASM385016v1	ST231	NA	NA	0	NA	NA	GCF_003850165.1_ASM385016v1 NA 0
	GCF_003855315.1_ASM385531v1	ST15	NA	NA	0	NA	NA	GCF_003855315.1_ASM385531v1 NA 0
	GCF_003855335.1_ASM385533v1	ST15	NA	NA	0	NA	NA	GCF_003855335.1_ASM385533v1 NA 0
	GCF_003855515.1_ASM385551v1	ST23	NA	NA	0	NA	NA	GCF_003855515.1_ASM385551v1 NA 0
	GCF_003855535.1_ASM385553v1	ST15	NA	NA	0	NA	NA	GCF_003855535.1_ASM385553v1 NA 0
	GCF_003855555.1_ASM385555v1	ST15	NA	NA	0	NA	NA	GCF_003855555.1_ASM385555v1 NA 0
	GCF_003856475.1_ASM385647v1	ST11	NA	NA	0	NA	NA	GCF_003856475.1_ASM385647v1 NA 0
	GCF_003856595.1_ASM385659v1	ST147	NA	NA	0	NA	NA	GCF_003856595.1_ASM385659v1 NA 0
	GCF_003931835.1_ASM393183v1	ST11	NA	NA	0	NA	NA	GCF_003931835.1_ASM393183v1 NA 0
	GCF_003932915.1_ASM393291v1	ST65	NA	NA	0	NA	NA	GCF_003932915.1_ASM393291v1 NA 0
	GCF_003934185.1_ASM393418v1	ST307	NA	NA	0	NA	NA	GCF_003934185.1_ASM393418v1 NA 0
	GCF_003940845.1_ASM394084v1	ST11	NA	NA	0	NA	NA	GCF_003940845.1_ASM394084v1 NA 0
	GCF_003953905.1_ASM395390v1	ST23	NA	NA	0	NA	NA	GCF_003953905.1_ASM395390v1 NA 0
	GCF_003990375.1_ASM399037v1	ST1770	NA	NA	0	NA	NA	GCF_003990375.1_ASM399037v1 NA 0
	GCF_004006035.1_ASM400603v1	ST437	NA	NA	0	NA	NA	GCF_004006035.1_ASM400603v1 NA 0
	GCF_004010915.1_ASM401091v1	ST421	NA	NA	0	NA	NA	GCF_004010915.1_ASM401091v1 NA 0
	GCF_004010995.1_ASM401099v1	ST101	NA	NA	0	NA	NA	GCF_004010995.1_ASM401099v1 NA 0
	GCF_004014965.1_ASM401496v1	ST46-2LV	NA	NA	0	NA	NA	GCF_004014965.1_ASM401496v1 NA 0
	GCF_004118955.1_ASM411895v1	ST23	NA	NA	0	NA	NA	GCF_004118955.1_ASM411895v1 NA 0
	GCF_004119955.1_ASM411995v1	ST11	NA	NA	0	NA	NA	GCF_004119955.1_ASM411995v1 NA 0
	GCF_004119975.1_ASM411997v1	ST11	NA	NA	0	NA	NA	GCF_004119975.1_ASM411997v1 NA 0
	GCF_004119995.1_ASM411999v1	ST11	NA	NA	0	NA	NA	GCF_004119995.1_ASM411999v1 NA 0
	GCF_004120015.1_ASM412001v1	ST37	NA	NA	0	NA	NA	GCF_004120015.1_ASM412001v1 NA 0
	GCF_004120035.1_ASM412003v1	ST343	NA	NA	0	NA	NA	GCF_004120035.1_ASM412003v1 NA 0
	GCF_004120055.1_ASM412005v1	ST661	NA	NA	0	NA	NA	GCF_004120055.1_ASM412005v1 NA 0
	GCF_004120075.1_ASM412007v1	ST2193-1LV	NA	NA	0	NA	NA	GCF_004120075.1_ASM412007v1 NA 0
	GCF_004120095.1_ASM412009v1	ST11	NA	NA	0	NA	NA	GCF_004120095.1_ASM412009v1 NA 0
	GCF_004120115.1_ASM412011v1	ST11	NA	NA	0	NA	NA	GCF_004120115.1_ASM412011v1 NA 0
	GCF_004120135.1_ASM412013v1	ST36-1LV	NA	NA	0	NA	NA	GCF_004120135.1_ASM412013v1 NA 0
	GCF_004120155.1_ASM412015v1	ST1764-1LV	NA	NA	0	NA	NA	GCF_004120155.1_ASM412015v1 NA 0
	GCF_004120175.1_ASM412017v1	ST17	NA	NA	0	NA	NA	GCF_004120175.1_ASM412017v1 NA 0
	GCF_004135795.1_ASM413579v1	ST14	NA	NA	0	NA	NA	GCF_004135795.1_ASM413579v1 NA 0
	GCF_004137665.1_ASM413766v1	ST20	NA	NA	0	NA	NA	GCF_004137665.1_ASM413766v1 NA 0
	GCF_004138665.1_ASM413866v1	ST726	NA	NA	0	NA	NA	GCF_004138665.1_ASM413866v1 NA 0
	GCF_004141975.1_ASM414197v1	ST11	NA	NA	0	NA	NA	GCF_004141975.1_ASM414197v1 NA 0
	GCF_004208475.1_ASM420847v1	ST37-1LV	NA	NA	0	NA	NA	GCF_004208475.1_ASM420847v1 NA 0
	GCF_004209795.1_ASM420979v1	ST23	NA	NA	0	NA	NA	GCF_004209795.1_ASM420979v1 NA 0
	GCF_004295385.1_ASM429538v1	ST15	NA	NA	0	NA	NA	GCF_004295385.1_ASM429538v1 NA 0
	GCF_004295405.1_ASM429540v1	ST23	NA	NA	0	NA	NA	GCF_004295405.1_ASM429540v1 NA 0
	GCF_004295605.1_ASM429560v1	ST15	NA	NA	0	NA	NA	GCF_004295605.1_ASM429560v1 NA 0
	GCF_004319525.1_ASM431952v1	ST15	NA	NA	0	NA	NA	GCF_004319525.1_ASM431952v1 NA 0
	GCF_004322795.1_ASM432279v1	ST11	NA	NA	0	NA	NA	GCF_004322795.1_ASM432279v1 NA 0
	GCF_004322955.1_ASM432295v1	ST45	NA	NA	0	NA	NA	GCF_004322955.1_ASM432295v1 NA 0
	GCF_004322995.1_ASM432299v1	ST35	NA	NA	0	NA	NA	GCF_004322995.1_ASM432299v1 NA 0
	GCF_004332075.1_ASM433207v1	ST86	NA	NA	0	NA	NA	GCF_004332075.1_ASM433207v1 NA 0
	GCF_004801235.1_ASM480123v1	ST27-2LV	NA	NA	0	NA	NA	GCF_004801235.1_ASM480123v1 NA 0
	GCF_004924315.1_ASM492431v1	ST23	NA	NA	0	NA	NA	GCF_004924315.1_ASM492431v1 NA 0
	GCF_005347525.1_ASM534752v1	ST11	NA	NA	0	NA	NA	GCF_005347525.1_ASM534752v1 NA 0
	GCF_005377825.1_ASM537782v1	ST23-2LV	NA	NA	0	NA	NA	GCF_005377825.1_ASM537782v1 NA 0
	GCF_005853785.1_ASM585378v1	ST11	NA	NA	0	NA	NA	GCF_005853785.1_ASM585378v1 NA 0
	GCF_005854025.1_ASM585402v1	ST11	NA	NA	0	NA	NA	GCF_005854025.1_ASM585402v1 NA 0
	GCF_005854245.1_ASM585424v1	ST11	NA	NA	0	NA	NA	GCF_005854245.1_ASM585424v1 NA 0
	GCF_005885775.1_ASM588577v1	ST15	NA	NA	0	NA	NA	GCF_005885775.1_ASM588577v1 NA 0
	GCF_005944305.1_ASM594430v1	ST147	NA	NA	0	NA	NA	GCF_005944305.1_ASM594430v1 NA 0
	GCF_006304565.1_ASM630456v1	ST11	NA	NA	0	NA	NA	GCF_006304565.1_ASM630456v1 NA 0
	GCF_006364295.1_ASM636429v1	ST3	NA	NA	0	NA	NA	GCF_006364295.1_ASM636429v1 NA 0
	GCF_006459145.1_ASM645914v1	ST101	NA	NA	0	NA	NA	GCF_006459145.1_ASM645914v1 NA 0
	GCF_006494895.1_ASM649489v1	ST11	NA	NA	0	NA	NA	GCF_006494895.1_ASM649489v1 NA 0
	GCF_006494915.1_ASM649491v1	ST11	NA	NA	0	NA	NA	GCF_006494915.1_ASM649491v1 NA 0
	GCF_006974165.1_ASM697416v1	ST968	NA	NA	0	NA	NA	GCF_006974165.1_ASM697416v1 NA 0
	GCF_007197815.1_ASM719781v1	ST1779	NA	NA	0	NA	NA	GCF_007197815.1_ASM719781v1 NA 0
	GCF_007833555.1_ASM783355v1	ST105	NA	NA	0	NA	NA	GCF_007833555.1_ASM783355v1 NA 0
	GCF_007833575.1_ASM783357v1	ST14	NA	NA	0	NA	NA	GCF_007833575.1_ASM783357v1 NA 0
	GCF_007873865.1_ASM787386v1	ST16	NA	NA	0	NA	NA	GCF_007873865.1_ASM787386v1 NA 0
	GCF_007999005.1_ASM799900v1	ST22	NA	NA	0	NA	NA	GCF_007999005.1_ASM799900v1 NA 0
	GCF_008065415.1_ASM806541v1	ST16	NA	NA	0	NA	NA	GCF_008065415.1_ASM806541v1 NA 0
	GCF_008121515.1_ASM812151v1	ST258	NA	NA	0	NA	NA	GCF_008121515.1_ASM812151v1 NA 0
	GCF_008122285.1_ASM812228v1	ST268-1LV	NA	NA	0	NA	NA	GCF_008122285.1_ASM812228v1 NA 0
	GCF_008122305.1_ASM812230v1	ST268	NA	NA	0	NA	NA	GCF_008122305.1_ASM812230v1 NA 0
	GCF_008369685.1_ASM836968v1	ST2268	NA	NA	0	NA	NA	GCF_008369685.1_ASM836968v1 NA 0
	GCF_008632415.1_ASM863241v1	ST1-1LV	NA	NA	0	NA	NA	GCF_008632415.1_ASM863241v1 NA 0
	GCF_008693405.1_ASM869340v1	ST147	NA	NA	0	NA	NA	GCF_008693405.1_ASM869340v1 NA 0
	GCF_008693425.1_ASM869342v1	ST1833-1LV	NA	NA	0	NA	NA	GCF_008693425.1_ASM869342v1 NA 0
	GCF_008693445.1_ASM869344v1	ST231	NA	NA	0	NA	NA	GCF_008693445.1_ASM869344v1 NA 0
	GCF_008728415.1_ASM872841v1	ST11	NA	NA	0	NA	NA	GCF_008728415.1_ASM872841v1 NA 0
	GCF_008728695.1_ASM872869v1	ST11	NA	NA	0	NA	NA	GCF_008728695.1_ASM872869v1 NA 0
	GCF_008931345.1_ASM893134v1	ST12	NA	NA	0	NA	NA	GCF_008931345.1_ASM893134v1 NA 0
	GCF_008931565.1_ASM893156v1	ST1109	NA	NA	0	NA	NA	GCF_008931565.1_ASM893156v1 NA 0
	GCF_009025895.1_ASM902589v1	ST16	NA	NA	0	NA	NA	GCF_009025895.1_ASM902589v1 NA 0
	GCF_009387775.1_ASM938777v1	ST39	NA	NA	0	NA	NA	GCF_009387775.1_ASM938777v1 NA 0
	GCF_009387795.1_ASM938779v1	ST1321	NA	NA	0	NA	NA	GCF_009387795.1_ASM938779v1 NA 0
	GCF_009387815.1_ASM938781v1	ST873	NA	NA	0	NA	NA	GCF_009387815.1_ASM938781v1 NA 0
	GCF_009387915.1_ASM938791v1	ST1315	NA	NA	0	NA	NA	GCF_009387915.1_ASM938791v1 NA 0
	GCF_009387945.1_ASM938794v1	ST87	NA	NA	0	NA	NA	GCF_009387945.1_ASM938794v1 NA 0
	GCF_009497695.1_ASM949769v1	ST23	NA	NA	0	NA	NA	GCF_009497695.1_ASM949769v1 NA 0
	GCF_009497735.1_ASM949773v1	ST392	NA	NA	0	NA	NA	GCF_009497735.1_ASM949773v1 NA 0
	GCF_009497755.1_ASM949775v1	ST1265	NA	NA	0	NA	NA	GCF_009497755.1_ASM949775v1 NA 0
	GCF_009498255.1_ASM949825v1	ST852	NA	NA	0	NA	NA	GCF_009498255.1_ASM949825v1 NA 0
	GCF_009556655.1_ASM955665v1	ST25	NA	NA	0	NA	NA	GCF_009556655.1_ASM955665v1 NA 0
	GCF_009601745.1_ASM960174v1	ST34-2LV	NA	NA	0	NA	NA	GCF_009601745.1_ASM960174v1 NA 0
	FK688	ST1224	SAMN14132404	Klebsiella quasipneumoniae subsp. similipneumoniae	2013	China	Human	FK688 China 2013
