# Supplementary material for: The evolutionary mechanism of non-carbapenemase carbapenem-resistant phenotypes in Klebsiella spp
Source: eLife. 2023 Jul 6;12:e83107. doi: 10.7554/eLife.83107 (PMC10325707; doi:10.7554/eLife.83107)
Supplement: Figure 1—source data 2. [file elife-83107-fig1-data2.xlsx]

## Sheet: Growth curve-source data
Figure 1 source data 2
Figure 1-source data 2. Growth rate analysis of E. coli BW25113 strains expressing the indicated open-reading frames cloned into plasmid pJP-CmR.
Source data
		OD600nm
	Time (hours)	DHA-1						WT+ pJP-CmR						WT
	0	0.0016	0.0004	0	0.0002	0.0028	0.0024	0.0027	0.0021	0.0007	0.0024	0.0005	0.0016	0.0004	0.0016	-0.0001	0.0042	0.0042	0.0043
	1	0.005167	0.005267	0.0048	0.0039	0.0076	0.006	0.0091	0.0098	0.0098	0.006033	0.005533	0.006733	0.0059	0.0064	0.0034	0.009933	0.011733	0.015133
	2	0.0279	0.0407	0.0376	0.0299	0.0381	0.0311	0.0569	0.0624	0.0729	0.027867	0.045667	0.040267	0.054	0.0466	0.0327	0.040867	0.061767	0.080367
	3	0.133033	0.175033	0.1697	0.1444	0.1662	0.1433	0.2476	0.2817	0.2907	0.1232	0.2078	0.1895	0.255	0.232	0.1832	0.1731	0.252	0.3197
	4	0.399367	0.471667	0.4537	0.4151	0.4535	0.4117	0.6024	0.6451	0.6755	0.372667	0.605767	0.495767	0.6034	0.5826	0.5271	0.482667	0.610067	0.714567
	5	0.715767	0.818567	0.7808	0.7383	0.7806	0.7411	0.9358	0.9551	0.9773	0.717133	0.931433	0.761333	0.8721	0.8633	0.8363	0.808933	0.855533	0.940433
	6	0.9345	1.044	1.0045	0.9707	1.0042	0.982	1.1072	1.1242	1.1301	0.893933	1.08393	0.916433	0.9937	0.9982	0.995	0.973133	0.969233	1.04433
	7	1.06567	1.17637	1.1277	1.0945	1.1315	1.1188	1.2234	1.2377	1.236	0.9643	1.18	1.0112	1.0922	1.0999	1.0986	1.0713	1.07	1.1395
	8	1.17597	1.27877	1.2334	1.2026	1.2363	1.2292	1.3162	1.33	1.3252	1.03797	1.25587	1.10877	1.1803	1.1943	1.198	1.14177	1.15517	1.24057
	9	1.25903	1.35243	1.316	1.2907	1.3178	1.3145	1.3864	1.4016	1.3911	1.099	1.3277	1.1885	1.2559	1.2734	1.2815	1.2018	1.2278	1.3236
	10	1.32743	1.41413	1.3759	1.3493	1.3778	1.3765	1.4365	1.4535	1.4386	1.13637	1.37867	1.24697	1.3172	1.3356	1.346	1.24567	1.26717	1.39037
	11	1.38823	1.46863	1.4255	1.4048	1.4337	1.4344	1.4863	1.4979	1.4867	1.19033	1.42753	1.29623	1.3749	1.3964	1.4076	1.28793	1.30733	1.45153
	12	1.43633	1.51973	1.4728	1.4557	1.4847	1.4851	1.5339	1.5434	1.5334	1.22503	1.47493	1.34243	1.4301	1.4537	1.4679	1.32913	1.34503	1.50633
	13	1.48437	1.55837	1.5097	1.4922	1.5184	1.521	1.5685	1.5774	1.5688	1.25277	1.51667	1.38377	1.476	1.4991	1.5145	1.36187	1.37447	1.54337
	14	1.52307	1.59397	1.5431	1.5264	1.5517	1.5554	1.5959	1.6091	1.5997	1.295	1.5573	1.4224	1.5173	1.5401	1.5545	1.3987	1.408	1.5805
	15	1.55503	1.62723	1.5741	1.554	1.5839	1.588	1.6251	1.6349	1.6317	1.32337	1.58777	1.45317	1.5512	1.576	1.5928	1.42467	1.42897	1.59847
	16	1.5813	1.6535	1.5971	1.5768	1.6073	1.6123	1.6421	1.6494	1.6515	1.3459	1.6141	1.4816	1.5805	1.6026	1.6183	1.4484	1.4464	1.6222
	17	1.59717	1.66677	1.6141	1.5955	1.6246	1.6282	1.6531	1.6616	1.6635	1.38477	1.64397	1.50757	1.6002	1.6202	1.6348	1.47737	1.47297	1.64907
	18	1.60923	1.67733	1.6254	1.6113	1.639	1.6431	1.6641	1.6691	1.6732	1.41317	1.66677	1.53037	1.6148	1.6342	1.6479	1.50217	1.49327	1.66947
	19	1.61747	1.68667	1.6325	1.6145	1.6397	1.6464	1.6647	1.6719	1.6829	1.43007	1.68277	1.54757	1.6228	1.6403	1.657	1.52347	1.51267	1.68407
	20	1.6198	1.6901	1.6365	1.6195	1.6425	1.6485	1.6651	1.6732	1.6836	1.45733	1.69423	1.57193	1.6284	1.6447	1.6641	1.54893	1.53273	1.69763
	21	1.62613	1.69533	1.6408	1.6219	1.6471	1.6544	1.6658	1.6727	1.6812	1.49927	1.70287	1.59027	1.6328	1.6485	1.6685	1.57097	1.56047	1.70787
	22	1.6288	1.6972	1.6445	1.6275	1.6545	1.6602	1.6685	1.6722	1.6828	1.51263	1.70633	1.60263	1.6368	1.6531	1.6736	1.58413	1.56893	1.71253
	23	1.62843	1.69663	1.6429	1.6248	1.6508	1.6568	1.6615	1.6705	1.6764	1.53487	1.71037	1.61227	1.6351	1.6511	1.6738	1.59607	1.57437	1.71857
	24	1.6341	1.7025	1.6466	1.6281	1.6575	1.6657	1.6622	1.6669	1.6766	1.5675	1.7142	1.6244	1.6387	1.6545	1.6788	1.6085	1.5843	1.7279
		OD600nm
	Time (hours)	OKP-B-21						WT+ pJP-CmR						WT
	0	0.0017	0.0019	0	-0.0005	0.0008	0.0018	0.0027	0.0021	0.0007	0.0024	0.0005	0.0016	0.0004	0.0016	-0.0001	0.0042	0.0042	0.0043
	1	0.0039	0.0021	0.0019	0.0525	0.002	0.0026	0.0091	0.0098	0.0098	0.006033	0.005533	0.006733	0.0059	0.0064	0.0034	0.009933	0.011733	0.015133
	2	0.0087	0.0071	0.0069	0.0571	0.0065	0.0073	0.0569	0.0624	0.0729	0.027867	0.045667	0.040267	0.054	0.0466	0.0327	0.040867	0.061767	0.080367
	3	0.0205	0.0208	0.0206	0.0695	0.0188	0.019	0.2476	0.2817	0.2907	0.1232	0.2078	0.1895	0.255	0.232	0.1832	0.1731	0.252	0.3197
	4	0.0516	0.0552	0.0558	0.1027	0.0513	0.0504	0.6024	0.6451	0.6755	0.372667	0.605767	0.495767	0.6034	0.5826	0.5271	0.482667	0.610067	0.714567
	5	0.1258	0.1295	0.132	0.1761	0.1227	0.1187	0.9358	0.9551	0.9773	0.717133	0.931433	0.761333	0.8721	0.8633	0.8363	0.808933	0.855533	0.940433
	6	0.2612	0.2584	0.2703	0.3078	0.251	0.24	1.1072	1.1242	1.1301	0.893933	1.08393	0.916433	0.9937	0.9982	0.995	0.973133	0.969233	1.04433
	7	0.4668	0.4603	0.4888	0.5076	0.437	0.4165	1.2234	1.2377	1.236	0.9643	1.18	1.0112	1.0922	1.0999	1.0986	1.0713	1.07	1.1395
	8	0.7065	0.6946	0.7193	0.742	0.6606	0.6166	1.3162	1.33	1.3252	1.03797	1.25587	1.10877	1.1803	1.1943	1.198	1.14177	1.15517	1.24057
	9	0.8684	0.8316	0.8904	0.9469	0.8107	0.7383	1.3864	1.4016	1.3911	1.099	1.3277	1.1885	1.2559	1.2734	1.2815	1.2018	1.2278	1.3236
	10	0.9792	0.9381	1.0191	1.0557	0.9114	0.8521	1.4365	1.4535	1.4386	1.13637	1.37867	1.24697	1.3172	1.3356	1.346	1.24567	1.26717	1.39037
	11	1.0931	1.053	1.1325	1.1488	1.0355	0.9774	1.4863	1.4979	1.4867	1.19033	1.42753	1.29623	1.3749	1.3964	1.4076	1.28793	1.30733	1.45153
	12	1.213	1.1631	1.2395	1.2423	1.1481	1.1153	1.5339	1.5434	1.5334	1.22503	1.47493	1.34243	1.4301	1.4537	1.4679	1.32913	1.34503	1.50633
	13	1.2781	1.2262	1.2867	1.3051	1.2229	1.2233	1.5685	1.5774	1.5688	1.25277	1.51667	1.38377	1.476	1.4991	1.5145	1.36187	1.37447	1.54337
	14	1.3435	1.2964	1.3374	1.3466	1.293	1.3078	1.5959	1.6091	1.5997	1.295	1.5573	1.4224	1.5173	1.5401	1.5545	1.3987	1.408	1.5805
	15	1.4034	1.3687	1.3951	1.4132	1.3592	1.3675	1.6251	1.6349	1.6317	1.32337	1.58777	1.45317	1.5512	1.576	1.5928	1.42467	1.42897	1.59847
	16	1.4455	1.4214	1.4374	1.4562	1.4097	1.4143	1.6421	1.6494	1.6515	1.3459	1.6141	1.4816	1.5805	1.6026	1.6183	1.4484	1.4464	1.6222
	17	1.4904	1.4623	1.4745	1.5002	1.452	1.4526	1.6531	1.6616	1.6635	1.38477	1.64397	1.50757	1.6002	1.6202	1.6348	1.47737	1.47297	1.64907
	18	1.5355	1.5003	1.5115	1.5399	1.4952	1.4917	1.6641	1.6691	1.6732	1.41317	1.66677	1.53037	1.6148	1.6342	1.6479	1.50217	1.49327	1.66947
	19	1.5642	1.5253	1.5346	1.5651	1.522	1.5137	1.6647	1.6719	1.6829	1.43007	1.68277	1.54757	1.6228	1.6403	1.657	1.52347	1.51267	1.68407
	20	1.5926	1.5515	1.5611	1.5905	1.5484	1.5349	1.6651	1.6732	1.6836	1.45733	1.69423	1.57193	1.6284	1.6447	1.6641	1.54893	1.53273	1.69763
	21	1.622	1.5731	1.589	1.6112	1.5698	1.5596	1.6658	1.6727	1.6812	1.49927	1.70287	1.59027	1.6328	1.6485	1.6685	1.57097	1.56047	1.70787
	22	1.6454	1.6018	1.6135	1.64	1.6015	1.5825	1.6685	1.6722	1.6828	1.51263	1.70633	1.60263	1.6368	1.6531	1.6736	1.58413	1.56893	1.71253
	23	1.6539	1.6079	1.6214	1.6485	1.6085	1.5896	1.6615	1.6705	1.6764	1.53487	1.71037	1.61227	1.6351	1.6511	1.6738	1.59607	1.57437	1.71857
	24	1.673	1.6273	1.6429	1.6652	1.6265	1.6036	1.6622	1.6669	1.6766	1.5675	1.7142	1.6244	1.6387	1.6545	1.6788	1.6085	1.5843	1.7279
		OD600nm
	Time (hours)	SHK						WT+ pJP-CmR						WT
	0	0.0019	0.0009	0.0005	0.003	0.0031	0.0029	0.0027	0.0021	0.0007	0.0024	0.0005	0.0016	0.0004	0.0016	-0.0001	0.0042	0.0042	0.0043
	1	0.0026	0.0007	0.0007	0.0033	0.0034	0.0043	0.0091	0.0098	0.0098	0.006033	0.005533	0.006733	0.0059	0.0064	0.0034	0.009933	0.011733	0.015133
	2	0.0039	0.0008	0.001	0.0046	0.0048	0.0052	0.0569	0.0624	0.0729	0.027867	0.045667	0.040267	0.054	0.0466	0.0327	0.040867	0.061767	0.080367
	3	0.008	0.0024	0.0016	0.005	0.0058	0.0057	0.2476	0.2817	0.2907	0.1232	0.2078	0.1895	0.255	0.232	0.1832	0.1731	0.252	0.3197
	4	0.0172	0.0055	0.0039	0.0054	0.0063	0.0059	0.6024	0.6451	0.6755	0.372667	0.605767	0.495767	0.6034	0.5826	0.5271	0.482667	0.610067	0.714567
	5	0.057	0.0184	0.0134	0.0073	0.0084	0.0075	0.9358	0.9551	0.9773	0.717133	0.931433	0.761333	0.8721	0.8633	0.8363	0.808933	0.855533	0.940433
	6	0.1641	0.0754	0.0537	0.0168	0.0206	0.02	1.1072	1.1242	1.1301	0.893933	1.08393	0.916433	0.9937	0.9982	0.995	0.973133	0.969233	1.04433
	7	0.3998	0.2174	0.177	0.0648	0.0732	0.0803	1.2234	1.2377	1.236	0.9643	1.18	1.0112	1.0922	1.0999	1.0986	1.0713	1.07	1.1395
	8	0.7571	0.5165	0.4656	0.1974	0.2076	0.2316	1.3162	1.33	1.3252	1.03797	1.25587	1.10877	1.1803	1.1943	1.198	1.14177	1.15517	1.24057
	9	0.9664	0.8608	0.8186	0.439	0.4732	0.5389	1.3864	1.4016	1.3911	1.099	1.3277	1.1885	1.2559	1.2734	1.2815	1.2018	1.2278	1.3236
	10	1.0854	1.0407	1.0123	0.7399	0.786	0.8365	1.4365	1.4535	1.4386	1.13637	1.37867	1.24697	1.3172	1.3356	1.346	1.24567	1.26717	1.39037
	11	1.173	1.1479	1.1263	0.8973	0.9376	0.9786	1.4863	1.4979	1.4867	1.19033	1.42753	1.29623	1.3749	1.3964	1.4076	1.28793	1.30733	1.45153
	12	1.2627	1.24	1.2222	0.9757	1.0137	1.0534	1.5339	1.5434	1.5334	1.22503	1.47493	1.34243	1.4301	1.4537	1.4679	1.32913	1.34503	1.50633
	13	1.331	1.3203	1.309	1.0441	1.1008	1.1405	1.5685	1.5774	1.5688	1.25277	1.51667	1.38377	1.476	1.4991	1.5145	1.36187	1.37447	1.54337
	14	1.3907	1.3866	1.3762	1.124	1.1775	1.2173	1.5959	1.6091	1.5997	1.295	1.5573	1.4224	1.5173	1.5401	1.5545	1.3987	1.408	1.5805
	15	1.4423	1.4408	1.4316	1.2012	1.2489	1.28	1.6251	1.6349	1.6317	1.32337	1.58777	1.45317	1.5512	1.576	1.5928	1.42467	1.42897	1.59847
	16	1.4903	1.4894	1.4782	1.2569	1.3006	1.3288	1.6421	1.6494	1.6515	1.3459	1.6141	1.4816	1.5805	1.6026	1.6183	1.4484	1.4464	1.6222
	17	1.5299	1.5349	1.5282	1.3023	1.3451	1.3753	1.6531	1.6616	1.6635	1.38477	1.64397	1.50757	1.6002	1.6202	1.6348	1.47737	1.47297	1.64907
	18	1.5624	1.5678	1.5628	1.3444	1.3849	1.4146	1.6641	1.6691	1.6732	1.41317	1.66677	1.53037	1.6148	1.6342	1.6479	1.50217	1.49327	1.66947
	19	1.589	1.5931	1.5881	1.3849	1.426	1.4538	1.6647	1.6719	1.6829	1.43007	1.68277	1.54757	1.6228	1.6403	1.657	1.52347	1.51267	1.68407
	20	1.6111	1.6177	1.6109	1.4178	1.4574	1.482	1.6651	1.6732	1.6836	1.45733	1.69423	1.57193	1.6284	1.6447	1.6641	1.54893	1.53273	1.69763
	21	1.6321	1.6411	1.6363	1.4459	1.4808	1.5029	1.6658	1.6727	1.6812	1.49927	1.70287	1.59027	1.6328	1.6485	1.6685	1.57097	1.56047	1.70787
	22	1.6483	1.6555	1.6501	1.4702	1.5039	1.5257	1.6685	1.6722	1.6828	1.51263	1.70633	1.60263	1.6368	1.6531	1.6736	1.58413	1.56893	1.71253
	23	1.6596	1.6666	1.661	1.494	1.5288	1.5521	1.6615	1.6705	1.6764	1.53487	1.71037	1.61227	1.6351	1.6511	1.6738	1.59607	1.57437	1.71857
	24	1.6684	1.6748	1.6725	1.5176	1.5531	1.5662	1.6622	1.6669	1.6766	1.5675	1.7142	1.6244	1.6387	1.6545	1.6788	1.6085	1.5843	1.7279
		OD600nm
	Time (hours)	OPHC						WT+ pJP-CmR						WT
	0	0.0026	0.0029	0.0009	0.0013	0.002	0.0019	0.0027	0.0021	0.0007	0.0024	0.0005	0.0016	0.0004	0.0016	-0.0001	0.0042	0.0042	0.0043
	1	0.0034	0.0038	0.0015	0.0029	0.0042	0.0029	0.0091	0.0098	0.0098	0.006033	0.005533	0.006733	0.0059	0.0064	0.0034	0.009933	0.011733	0.015133
	2	0.0038	0.0042	0.0011	0.0027	0.0058	0.003	0.0569	0.0624	0.0729	0.027867	0.045667	0.040267	0.054	0.0466	0.0327	0.040867	0.061767	0.080367
	3	0.0029	0.0029	0.0004	0.0011	0.004	0.0017	0.2476	0.2817	0.2907	0.1232	0.2078	0.1895	0.255	0.232	0.1832	0.1731	0.252	0.3197
	4	0.0024	0.003	0	0.0013	0.0045	0.0017	0.6024	0.6451	0.6755	0.372667	0.605767	0.495767	0.6034	0.5826	0.5271	0.482667	0.610067	0.714567
	5	0.0028	0.0035	0.0003	0.0016	0.0074	0.0017	0.9358	0.9551	0.9773	0.717133	0.931433	0.761333	0.8721	0.8633	0.8363	0.808933	0.855533	0.940433
	6	0.0029	0.0044	-0.0001	0.0023	0.0127	0.0018	1.1072	1.1242	1.1301	0.893933	1.08393	0.916433	0.9937	0.9982	0.995	0.973133	0.969233	1.04433
	7	0.0046	0.0074	0.0009	0.0056	0.0232	0.0037	1.2234	1.2377	1.236	0.9643	1.18	1.0112	1.0922	1.0999	1.0986	1.0713	1.07	1.1395
	8	0.0088	0.0147	0.0037	0.012	0.0445	0.0085	1.3162	1.33	1.3252	1.03797	1.25587	1.10877	1.1803	1.1943	1.198	1.14177	1.15517	1.24057
	9	0.0149	0.0275	0.0063	0.0214	0.0817	0.0134	1.3864	1.4016	1.3911	1.099	1.3277	1.1885	1.2559	1.2734	1.2815	1.2018	1.2278	1.3236
	10	0.028	0.0517	0.0117	0.0403	0.1413	0.0238	1.4365	1.4535	1.4386	1.13637	1.37867	1.24697	1.3172	1.3356	1.346	1.24567	1.26717	1.39037
	11	0.0517	0.09	0.0229	0.0803	0.2321	0.0483	1.4863	1.4979	1.4867	1.19033	1.42753	1.29623	1.3749	1.3964	1.4076	1.28793	1.30733	1.45153
	12	0.0925	0.1408	0.0467	0.1556	0.3581	0.0974	1.5339	1.5434	1.5334	1.22503	1.47493	1.34243	1.4301	1.4537	1.4679	1.32913	1.34503	1.50633
	13	0.1543	0.2159	0.0899	0.2408	0.4727	0.179	1.5685	1.5774	1.5688	1.25277	1.51667	1.38377	1.476	1.4991	1.5145	1.36187	1.37447	1.54337
	14	0.2478	0.3441	0.1873	0.3394	0.5257	0.3081	1.5959	1.6091	1.5997	1.295	1.5573	1.4224	1.5173	1.5401	1.5545	1.3987	1.408	1.5805
	15	0.3612	0.4382	0.2822	0.3658	0.5583	0.3664	1.6251	1.6349	1.6317	1.32337	1.58777	1.45317	1.5512	1.576	1.5928	1.42467	1.42897	1.59847
	16	0.4487	0.5012	0.3505	0.3995	0.5969	0.4359	1.6421	1.6494	1.6515	1.3459	1.6141	1.4816	1.5805	1.6026	1.6183	1.4484	1.4464	1.6222
	17	0.481	0.5559	0.4176	0.4681	0.6887	0.4895	1.6531	1.6616	1.6635	1.38477	1.64397	1.50757	1.6002	1.6202	1.6348	1.47737	1.47297	1.64907
	18	0.5078	0.6163	0.4596	0.5341	0.8254	0.5498	1.6641	1.6691	1.6732	1.41317	1.66677	1.53037	1.6148	1.6342	1.6479	1.50217	1.49327	1.66947
	19	0.5365	0.6452	0.5273	0.644	0.8574	0.6071	1.6647	1.6719	1.6829	1.43007	1.68277	1.54757	1.6228	1.6403	1.657	1.52347	1.51267	1.68407
	20	0.5825	0.7347	0.5927	0.8219	0.9163	0.6844	1.6651	1.6732	1.6836	1.45733	1.69423	1.57193	1.6284	1.6447	1.6641	1.54893	1.53273	1.69763
	21	0.6443	0.8619	0.6679	0.9187	0.9807	0.746	1.6658	1.6727	1.6812	1.49927	1.70287	1.59027	1.6328	1.6485	1.6685	1.57097	1.56047	1.70787
	22	0.7637	0.9511	0.7137	0.9931	1.0314	0.804	1.6685	1.6722	1.6828	1.51263	1.70633	1.60263	1.6368	1.6531	1.6736	1.58413	1.56893	1.71253
	23	0.8507	1.015	0.7563	1.0497	1.0776	0.8573	1.6615	1.6705	1.6764	1.53487	1.71037	1.61227	1.6351	1.6511	1.6738	1.59607	1.57437	1.71857
	24	0.9174	1.0733	0.7974	1.1021	1.1224	0.9069	1.6622	1.6669	1.6766	1.5675	1.7142	1.6244	1.6387	1.6545	1.6788	1.6085	1.5843	1.7279
		OD600nm
	Time (hours)	DAE						WT+ pJP-CmR						WT
	0	0.0026	0.0026	0.0021	0.0011	0.0043	0.0013	0.0027	0.0021	0.0007	0.0024	0.0005	0.0016	0.0004	0.0016	-0.0001	0.0042	0.0042	0.0043
	1	0.0047	0.0035	0.0034	0.0011	0.0104	0.003	0.0091	0.0098	0.0098	0.006033	0.005533	0.006733	0.0059	0.0064	0.0034	0.009933	0.011733	0.015133
	2	0.0127	0.0074	0.0068	0.0019	0.0278	0.0084	0.0569	0.0624	0.0729	0.027867	0.045667	0.040267	0.054	0.0466	0.0327	0.040867	0.061767	0.080367
	3	0.0358	0.018	0.0165	0.0046	0.0739	0.0243	0.2476	0.2817	0.2907	0.1232	0.2078	0.1895	0.255	0.232	0.1832	0.1731	0.252	0.3197
	4	0.0913	0.0476	0.0418	0.0127	0.1862	0.0663	0.6024	0.6451	0.6755	0.372667	0.605767	0.495767	0.6034	0.5826	0.5271	0.482667	0.610067	0.714567
	5	0.2025	0.1144	0.0961	0.0308	0.3798	0.1578	0.9358	0.9551	0.9773	0.717133	0.931433	0.761333	0.8721	0.8633	0.8363	0.808933	0.855533	0.940433
	6	0.3684	0.231	0.1989	0.0675	0.5674	0.316	1.1072	1.1242	1.1301	0.893933	1.08393	0.916433	0.9937	0.9982	0.995	0.973133	0.969233	1.04433
	7	0.5645	0.4058	0.3595	0.1309	0.6542	0.5164	1.2234	1.2377	1.236	0.9643	1.18	1.0112	1.0922	1.0999	1.0986	1.0713	1.07	1.1395
	8	0.7058	0.5974	0.547	0.2364	0.7328	0.6565	1.3162	1.33	1.3252	1.03797	1.25587	1.10877	1.1803	1.1943	1.198	1.14177	1.15517	1.24057
	9	0.7644	0.7132	0.6882	0.384	0.8095	0.7222	1.3864	1.4016	1.3911	1.099	1.3277	1.1885	1.2559	1.2734	1.2815	1.2018	1.2278	1.3236
	10	0.8183	0.7817	0.7556	0.4731	0.8733	0.7875	1.4365	1.4535	1.4386	1.13637	1.37867	1.24697	1.3172	1.3356	1.346	1.24567	1.26717	1.39037
	11	0.8723	0.8602	0.8216	0.5108	0.9633	0.8461	1.4863	1.4979	1.4867	1.19033	1.42753	1.29623	1.3749	1.3964	1.4076	1.28793	1.30733	1.45153
	12	0.9124	0.9144	0.8767	0.553	1.0003	0.8981	1.5339	1.5434	1.5334	1.22503	1.47493	1.34243	1.4301	1.4537	1.4679	1.32913	1.34503	1.50633
	13	0.9541	0.9574	0.9232	0.5938	1.0227	0.9561	1.5685	1.5774	1.5688	1.25277	1.51667	1.38377	1.476	1.4991	1.5145	1.36187	1.37447	1.54337
	14	1.0162	1.0133	0.982	0.6522	1.0578	1.0303	1.5959	1.6091	1.5997	1.295	1.5573	1.4224	1.5173	1.5401	1.5545	1.3987	1.408	1.5805
	15	1.0702	1.0758	1.0477	0.6974	1.0805	1.0585	1.6251	1.6349	1.6317	1.32337	1.58777	1.45317	1.5512	1.576	1.5928	1.42467	1.42897	1.59847
	16	1.114	1.1246	1.1045	0.7667	1.094	1.0784	1.6421	1.6494	1.6515	1.3459	1.6141	1.4816	1.5805	1.6026	1.6183	1.4484	1.4464	1.6222
	17	1.1461	1.1625	1.1404	0.8471	1.124	1.1006	1.6531	1.6616	1.6635	1.38477	1.64397	1.50757	1.6002	1.6202	1.6348	1.47737	1.47297	1.64907
	18	1.1711	1.1811	1.169	0.8817	1.1475	1.1146	1.6641	1.6691	1.6732	1.41317	1.66677	1.53037	1.6148	1.6342	1.6479	1.50217	1.49327	1.66947
	19	1.1905	1.215	1.1959	0.899	1.1668	1.1251	1.6647	1.6719	1.6829	1.43007	1.68277	1.54757	1.6228	1.6403	1.657	1.52347	1.51267	1.68407
	20	1.2169	1.2508	1.2221	0.9169	1.1821	1.1402	1.6651	1.6732	1.6836	1.45733	1.69423	1.57193	1.6284	1.6447	1.6641	1.54893	1.53273	1.69763
	21	1.2446	1.2837	1.2471	0.9463	1.2005	1.1574	1.6658	1.6727	1.6812	1.49927	1.70287	1.59027	1.6328	1.6485	1.6685	1.57097	1.56047	1.70787
	22	1.2661	1.3094	1.2695	0.9677	1.2144	1.169	1.6685	1.6722	1.6828	1.51263	1.70633	1.60263	1.6368	1.6531	1.6736	1.58413	1.56893	1.71253
	23	1.2899	1.3398	1.2937	0.991	1.2308	1.1828	1.6615	1.6705	1.6764	1.53487	1.71037	1.61227	1.6351	1.6511	1.6738	1.59607	1.57437	1.71857
	24	1.3177	1.3721	1.3179	1.0255	1.2501	1.1981	1.6622	1.6669	1.6766	1.5675	1.7142	1.6244	1.6387	1.6545	1.6788	1.6085	1.5843	1.7279
		OD600nm
	Time (hours)	ABH						WT+ pJP-CmR						WT
	0	0.001367	0.002367	0.002967	0.000967	0.002167	0.000967	0.0027	0.0021	0.0007	0.0024	0.0005	0.0016	0.0004	0.0016	-0.0001	0.0042	0.0042	0.0043
	1	0.001633	0.002733	0.003533	0.001433	0.002933	0.002533	0.0091	0.0098	0.0098	0.006033	0.005533	0.006733	0.0059	0.0064	0.0034	0.009933	0.011733	0.015133
	2	0.001967	0.003167	0.004367	0.002567	0.002967	0.003867	0.0569	0.0624	0.0729	0.027867	0.045667	0.040267	0.054	0.0466	0.0327	0.040867	0.061767	0.080367
	3	0.0018	0.0031	0.0047	0.0035	0.0029	0.0037	0.2476	0.2817	0.2907	0.1232	0.2078	0.1895	0.255	0.232	0.1832	0.1731	0.252	0.3197
	4	0.002167	0.003467	0.004667	0.005467	0.003567	0.004767	0.6024	0.6451	0.6755	0.372667	0.605767	0.495767	0.6034	0.5826	0.5271	0.482667	0.610067	0.714567
	5	0.003433	0.005633	0.007633	0.010133	0.006133	0.009633	0.9358	0.9551	0.9773	0.717133	0.931433	0.761333	0.8721	0.8633	0.8363	0.808933	0.855533	0.940433
	6	0.010533	0.013533	0.019133	0.034033	0.018733	0.028833	1.1072	1.1242	1.1301	0.893933	1.08393	0.916433	0.9937	0.9982	0.995	0.973133	0.969233	1.04433
	7	0.0438	0.0528	0.0647	0.1129	0.0678	0.09	1.2234	1.2377	1.236	0.9643	1.18	1.0112	1.0922	1.0999	1.0986	1.0713	1.07	1.1395
	8	0.130767	0.160967	0.180067	0.279467	0.195567	0.237467	1.3162	1.33	1.3252	1.03797	1.25587	1.10877	1.1803	1.1943	1.198	1.14177	1.15517	1.24057
	9	0.3002	0.3757	0.3829	0.5736	0.4228	0.4914	1.3864	1.4016	1.3911	1.099	1.3277	1.1885	1.2559	1.2734	1.2815	1.2018	1.2278	1.3236
	10	0.556967	0.655467	0.656067	0.850067	0.694467	0.766867	1.4365	1.4535	1.4386	1.13637	1.37867	1.24697	1.3172	1.3356	1.346	1.24567	1.26717	1.39037
	11	0.809333	0.840033	0.889033	1.00413	0.863633	0.928333	1.4863	1.4979	1.4867	1.19033	1.42753	1.29623	1.3749	1.3964	1.4076	1.28793	1.30733	1.45153
	12	0.952233	0.949633	1.01963	1.08713	0.970633	1.01763	1.5339	1.5434	1.5334	1.22503	1.47493	1.34243	1.4301	1.4537	1.4679	1.32913	1.34503	1.50633
	13	1.03167	1.02677	1.09537	1.15387	1.05097	1.09297	1.5685	1.5774	1.5688	1.25277	1.51667	1.38377	1.476	1.4991	1.5145	1.36187	1.37447	1.54337
	14	1.1059	1.111	1.1619	1.2289	1.1389	1.1686	1.5959	1.6091	1.5997	1.295	1.5573	1.4224	1.5173	1.5401	1.5545	1.3987	1.408	1.5805
	15	1.17387	1.16957	1.22757	1.27927	1.19727	1.22097	1.6251	1.6349	1.6317	1.32337	1.58777	1.45317	1.5512	1.576	1.5928	1.42467	1.42897	1.59847
	16	1.2218	1.2222	1.2741	1.322	1.246	1.2616	1.6421	1.6494	1.6515	1.3459	1.6141	1.4816	1.5805	1.6026	1.6183	1.4484	1.4464	1.6222
	17	1.27247	1.27487	1.32187	1.37107	1.30087	1.31157	1.6531	1.6616	1.6635	1.38477	1.64397	1.50757	1.6002	1.6202	1.6348	1.47737	1.47297	1.64907
	18	1.31577	1.32407	1.36547	1.41197	1.34577	1.35127	1.6641	1.6691	1.6732	1.41317	1.66677	1.53037	1.6148	1.6342	1.6479	1.50217	1.49327	1.66947
	19	1.35427	1.36267	1.40527	1.44427	1.38247	1.38207	1.6647	1.6719	1.6829	1.43007	1.68277	1.54757	1.6228	1.6403	1.657	1.52347	1.51267	1.68407
	20	1.39113	1.40163	1.44223	1.47263	1.41433	1.40893	1.6651	1.6732	1.6836	1.45733	1.69423	1.57193	1.6284	1.6447	1.6641	1.54893	1.53273	1.69763
	21	1.42307	1.43787	1.47677	1.49947	1.44577	1.43727	1.6658	1.6727	1.6812	1.49927	1.70287	1.59027	1.6328	1.6485	1.6685	1.57097	1.56047	1.70787
	22	1.44623	1.46083	1.50073	1.51803	1.46443	1.45283	1.6685	1.6722	1.6828	1.51263	1.70633	1.60263	1.6368	1.6531	1.6736	1.58413	1.56893	1.71253
	23	1.46887	1.48827	1.52787	1.53947	1.48497	1.47287	1.6615	1.6705	1.6764	1.53487	1.71037	1.61227	1.6351	1.6511	1.6738	1.59607	1.57437	1.71857
	24	1.4961	1.5082	1.5487	1.5554	1.5092	1.4981	1.6622	1.6669	1.6766	1.5675	1.7142	1.6244	1.6387	1.6545	1.6788	1.6085	1.5843	1.7279
		OD600nm
	Time (hours)	DAC						WT+ pJP-CmR						WT
	0	0.0004	-0.0001	0.0002	0.0001	-0.0001	-0.0002	0.0027	0.0021	0.0007	0.0024	0.0005	0.0016	0.0004	0.0016	-0.0001	0.0042	0.0042	0.0043
	1	0.0005	-0.0001	0.0003	-0.0003	-0.0006	-0.0006	0.0091	0.0098	0.0098	0.006033	0.005533	0.006733	0.0059	0.0064	0.0034	0.009933	0.011733	0.015133
	2	0.0002	-0.0003	0.0001	-0.0003	-0.0004	-0.0004	0.0569	0.0624	0.0729	0.027867	0.045667	0.040267	0.054	0.0466	0.0327	0.040867	0.061767	0.080367
	3	0.0004	-0.0002	0.0001	-0.0004	-0.0005	-0.0006	0.2476	0.2817	0.2907	0.1232	0.2078	0.1895	0.255	0.232	0.1832	0.1731	0.252	0.3197
	4	0.0003	-0.0005	-0.0002	-0.0006	-0.0008	-0.0005	0.6024	0.6451	0.6755	0.372667	0.605767	0.495767	0.6034	0.5826	0.5271	0.482667	0.610067	0.714567
	5	0.0004	-0.0002	0.0001	-0.0004	-0.0004	-0.0001	0.9358	0.9551	0.9773	0.717133	0.931433	0.761333	0.8721	0.8633	0.8363	0.808933	0.855533	0.940433
	6	0.0006	0.0002	0.0002	0.0004	0.0006	0.0009	1.1072	1.1242	1.1301	0.893933	1.08393	0.916433	0.9937	0.9982	0.995	0.973133	0.969233	1.04433
	7	0.0039	0.0049	0.0026	0.0054	0.0082	0.006	1.2234	1.2377	1.236	0.9643	1.18	1.0112	1.0922	1.0999	1.0986	1.0713	1.07	1.1395
	8	0.024	0.0324	0.0194	0.0341	0.0431	0.0275	1.3162	1.33	1.3252	1.03797	1.25587	1.10877	1.1803	1.1943	1.198	1.14177	1.15517	1.24057
	9	0.1125	0.1487	0.0986	0.1464	0.1648	0.1069	1.3864	1.4016	1.3911	1.099	1.3277	1.1885	1.2559	1.2734	1.2815	1.2018	1.2278	1.3236
	10	0.3594	0.4184	0.3178	0.4008	0.4169	0.3289	1.4365	1.4535	1.4386	1.13637	1.37867	1.24697	1.3172	1.3356	1.346	1.24567	1.26717	1.39037
	11	0.7041	0.7137	0.6407	0.7086	0.719	0.6798	1.4863	1.4979	1.4867	1.19033	1.42753	1.29623	1.3749	1.3964	1.4076	1.28793	1.30733	1.45153
	12	0.918	0.9042	0.867	0.9062	0.9101	0.9336	1.5339	1.5434	1.5334	1.22503	1.47493	1.34243	1.4301	1.4537	1.4679	1.32913	1.34503	1.50633
	13	1.039	1.0088	0.9956	1.0198	1.018	1.0659	1.5685	1.5774	1.5688	1.25277	1.51667	1.38377	1.476	1.4991	1.5145	1.36187	1.37447	1.54337
	14	1.1269	1.1004	1.0839	1.1118	1.1012	1.1605	1.5959	1.6091	1.5997	1.295	1.5573	1.4224	1.5173	1.5401	1.5545	1.3987	1.408	1.5805
	15	1.2252	1.2052	1.1857	1.2184	1.2005	1.2613	1.6251	1.6349	1.6317	1.32337	1.58777	1.45317	1.5512	1.576	1.5928	1.42467	1.42897	1.59847
	16	1.2954	1.2781	1.2609	1.2946	1.2746	1.3292	1.6421	1.6494	1.6515	1.3459	1.6141	1.4816	1.5805	1.6026	1.6183	1.4484	1.4464	1.6222
	17	1.356	1.3444	1.3243	1.3599	1.3371	1.388	1.6531	1.6616	1.6635	1.38477	1.64397	1.50757	1.6002	1.6202	1.6348	1.47737	1.47297	1.64907
	18	1.4133	1.4055	1.3826	1.419	1.3929	1.4443	1.6641	1.6691	1.6732	1.41317	1.66677	1.53037	1.6148	1.6342	1.6479	1.50217	1.49327	1.66947
	19	1.4611	1.4567	1.4314	1.4692	1.4416	1.4904	1.6647	1.6719	1.6829	1.43007	1.68277	1.54757	1.6228	1.6403	1.657	1.52347	1.51267	1.68407
	20	1.5035	1.5021	1.4754	1.5111	1.4836	1.5319	1.6651	1.6732	1.6836	1.45733	1.69423	1.57193	1.6284	1.6447	1.6641	1.54893	1.53273	1.69763
	21	1.5409	1.5392	1.5142	1.5465	1.5202	1.5638	1.6658	1.6727	1.6812	1.49927	1.70287	1.59027	1.6328	1.6485	1.6685	1.57097	1.56047	1.70787
	22	1.5679	1.5712	1.548	1.5766	1.5523	1.5947	1.6685	1.6722	1.6828	1.51263	1.70633	1.60263	1.6368	1.6531	1.6736	1.58413	1.56893	1.71253
	23	1.5846	1.5881	1.5677	1.5957	1.5708	1.6111	1.6615	1.6705	1.6764	1.53487	1.71037	1.61227	1.6351	1.6511	1.6738	1.59607	1.57437	1.71857
	24	1.5958	1.6022	1.5867	1.6074	1.588	1.6301	1.6622	1.6669	1.6766	1.5675	1.7142	1.6244	1.6387	1.6545	1.6788	1.6085	1.5843	1.7279
		OD600nm
	Time (hours)	TRN						WT+ pJP-CmR						WT
	0	0.0001	0	0.0008	0.0017	0.0004	0.0002	0.0027	0.0021	0.0007	0.0024	0.0005	0.0016	0.0004	0.0016	-0.0001	0.0042	0.0042	0.0043
	1	0.0026	0.0029	0.0033	0.0044	0.0028	0.0029	0.0091	0.0098	0.0098	0.006033	0.005533	0.006733	0.0059	0.0064	0.0034	0.009933	0.011733	0.015133
	2	0.0118	0.0112	0.0111	0.0134	0.0111	0.0122	0.0569	0.0624	0.0729	0.027867	0.045667	0.040267	0.054	0.0466	0.0327	0.040867	0.061767	0.080367
	3	0.0293	0.0275	0.0257	0.0308	0.0278	0.0309	0.2476	0.2817	0.2907	0.1232	0.2078	0.1895	0.255	0.232	0.1832	0.1731	0.252	0.3197
	4	0.0513	0.0508	0.045	0.0556	0.0516	0.0586	0.6024	0.6451	0.6755	0.372667	0.605767	0.495767	0.6034	0.5826	0.5271	0.482667	0.610067	0.714567
	5	0.0844	0.0816	0.0701	0.0871	0.0843	0.0951	0.9358	0.9551	0.9773	0.717133	0.931433	0.761333	0.8721	0.8633	0.8363	0.808933	0.855533	0.940433
	6	0.13	0.1216	0.1044	0.1304	0.1239	0.1426	1.1072	1.1242	1.1301	0.893933	1.08393	0.916433	0.9937	0.9982	0.995	0.973133	0.969233	1.04433
	7	0.2095	0.1937	0.163	0.2079	0.1888	0.218	1.2234	1.2377	1.236	0.9643	1.18	1.0112	1.0922	1.0999	1.0986	1.0713	1.07	1.1395
	8	0.3542	0.3283	0.2754	0.3536	0.306	0.3413	1.3162	1.33	1.3252	1.03797	1.25587	1.10877	1.1803	1.1943	1.198	1.14177	1.15517	1.24057
	9	0.5945	0.5871	0.5055	0.6326	0.5227	0.5308	1.3864	1.4016	1.3911	1.099	1.3277	1.1885	1.2559	1.2734	1.2815	1.2018	1.2278	1.3236
	10	0.8819	0.902	0.8431	0.9185	0.8409	0.786	1.4365	1.4535	1.4386	1.13637	1.37867	1.24697	1.3172	1.3356	1.346	1.24567	1.26717	1.39037
	11	1.0619	1.0899	1.0621	1.0963	1.0437	0.9628	1.4863	1.4979	1.4867	1.19033	1.42753	1.29623	1.3749	1.3964	1.4076	1.28793	1.30733	1.45153
	12	1.1687	1.1973	1.1816	1.2053	1.1598	1.0924	1.5339	1.5434	1.5334	1.22503	1.47493	1.34243	1.4301	1.4537	1.4679	1.32913	1.34503	1.50633
	13	1.2699	1.3061	1.2898	1.3097	1.2535	1.1782	1.5685	1.5774	1.5688	1.25277	1.51667	1.38377	1.476	1.4991	1.5145	1.36187	1.37447	1.54337
	14	1.3536	1.3902	1.3776	1.3905	1.3522	1.2847	1.5959	1.6091	1.5997	1.295	1.5573	1.4224	1.5173	1.5401	1.5545	1.3987	1.408	1.5805
	15	1.4257	1.4671	1.4538	1.4691	1.4318	1.3687	1.6251	1.6349	1.6317	1.32337	1.58777	1.45317	1.5512	1.576	1.5928	1.42467	1.42897	1.59847
	16	1.4886	1.5263	1.5138	1.532	1.4901	1.4296	1.6421	1.6494	1.6515	1.3459	1.6141	1.4816	1.5805	1.6026	1.6183	1.4484	1.4464	1.6222
	17	1.5441	1.5775	1.5647	1.5872	1.5397	1.4822	1.6531	1.6616	1.6635	1.38477	1.64397	1.50757	1.6002	1.6202	1.6348	1.47737	1.47297	1.64907
	18	1.5934	1.6225	1.6093	1.6359	1.5842	1.5306	1.6641	1.6691	1.6732	1.41317	1.66677	1.53037	1.6148	1.6342	1.6479	1.50217	1.49327	1.66947
	19	1.6334	1.6534	1.6393	1.6688	1.6129	1.5626	1.6647	1.6719	1.6829	1.43007	1.68277	1.54757	1.6228	1.6403	1.657	1.52347	1.51267	1.68407
	20	1.6605	1.6735	1.6579	1.6913	1.6377	1.5958	1.6651	1.6732	1.6836	1.45733	1.69423	1.57193	1.6284	1.6447	1.6641	1.54893	1.53273	1.69763
	21	1.6789	1.6866	1.672	1.7079	1.6527	1.6142	1.6658	1.6727	1.6812	1.49927	1.70287	1.59027	1.6328	1.6485	1.6685	1.57097	1.56047	1.70787
	22	1.6946	1.6982	1.6824	1.7199	1.6659	1.6325	1.6685	1.6722	1.6828	1.51263	1.70633	1.60263	1.6368	1.6531	1.6736	1.58413	1.56893	1.71253
	23	1.7019	1.701	1.6855	1.725	1.6691	1.6398	1.6615	1.6705	1.6764	1.53487	1.71037	1.61227	1.6351	1.6511	1.6738	1.59607	1.57437	1.71857
	24	1.7141	1.708	1.6909	1.7332	1.6759	1.6513	1.6622	1.6669	1.6766	1.5675	1.7142	1.6244	1.6387	1.6545	1.6788	1.6085	1.5843	1.7279

## Sheet: Statistics GraphPad Prism
	Statistics GraphPad Prism (9.5.1): Row statistics Mean with SD,N
		DHA-1			OKP			SHK			OPHC			DAE			ABH			DAC			TRN			WT+pJP-CmR			WT
	Time point	Mean	SD	N	Mean	SD	N	Mean	SD	N	Mean	SD	N	Mean	SD	N	Mean	SD	N	Mean	SD	N	Mean	SD	N	Mean	SD	N	Mean	SD	N
	0	0.00123333	0.00120277	6	0.00095	0.00102127	6	0.00205	0.00113798	6	0.00193333	0.000755425	6	0.00233333	0.00115355	6	0.00180033	0.000823812	6	5e-05	0.000225832	6	0.000533333	0.000637704	6	0.00166667	0.000904802	6	0.00243333	0.00204809	6
	1	0.00545567	0.00125406	6	0.0108333	0.0204258	6	0.0025	0.00149533	6	0.00311667	0.000941099	6	0.00435	0.00318544	6	0.00246633	0.000799166	6	-0.000133333	0.000458984	6	0.00315	0.000653452	6	0.00783317	0.00195364	6	0.00874983	0.00431991	6
	2	0.0342167	0.00523084	6	0.0156	0.0203445	6	0.00338333	0.00197019	6	0.00343333	0.00158072	6	0.0108333	0.00900148	6	0.00315033	0.00086814	6	-0.000183333	0.000263944	6	0.0118	0.00090111	6	0.0510002	0.0162675	6	0.0527168	0.0168914	6
	3	0.155278	0.0171708	6	0.0282	0.0202509	6	0.00475	0.0023696	6	0.00216667	0.00133517	6	0.02885	0.024318	6	0.00328333	0.000960035	6	-0.0002	0.000384708	6	0.0286667	0.00204222	6	0.223417	0.0631608	6	0.235833	0.0536335	6
	4	0.434172	0.0291236	6	0.0611667	0.0204656	6	0.00736667	0.00488576	6	0.00215	0.00153981	6	0.0743167	0.0607261	6	0.004017	0.00118448	6	-0.000383333	0.000386868	6	0.05215	0.00463627	6	0.5662	0.112662	6	0.586734	0.0794565	6
	5	0.762522	0.0375062	6	0.134133	0.0210977	6	0.0186667	0.0192694	6	0.00288333	0.00247016	6	0.163567	0.120749	6	0.00709967	0.00254689	6	-0.0001	0.000309839	6	0.0837667	0.0081451	6	0.879683	0.110881	6	0.862766	0.0442048	6
	6	0.989983	0.036999	6	0.264783	0.0234036	6	0.0584333	0.0567759	6	0.004	0.00450777	6	0.291533	0.170321	6	0.0207997	0.00899904	6	0.000483333	0.000271416	6	0.125483	0.0126463	6	1.04263	0.107904	6	0.9956	0.0267792	6
	7	1.11909	0.0373298	6	0.462833	0.0332103	6	0.16875	0.129289	6	0.00756667	0.00795605	6	0.43855	0.184607	6	0.072	0.0254229	6	0.00516667	0.00190858	6	0.196817	0.0197484	6	1.1421	0.12227	6	1.09525	0.0253431	6
	8	1.22604	0.0346592	6	0.689933	0.0449617	6	0.395967	0.224375	6	0.0153667	0.0147439	6	0.579317	0.18137	6	0.197384	0.053687	6	0.0300833	0.00835163	6	0.326467	0.0308397	6	1.229	0.125484	6	1.18502	0.0349982	6
	9	1.30841	0.0312174	6	0.847717	0.0716784	6	0.682817	0.225669	6	0.0275333	0.0275022	6	0.68025	0.151301	6	0.424433	0.0961996	6	0.12965	0.0270362	6	0.5622	0.0497605	6	1.29905	0.126239	6	1.26067	0.04272	6
	10	1.37018	0.0294138	6	0.959267	0.0741629	6	0.9168	0.146798	6	0.0494667	0.0470495	6	0.74825	0.140688	6	0.69665	0.101318	6	0.3737	0.044576	6	0.862067	0.0485111	6	1.34843	0.128924	6	1.317	0.0531817	6
	11	1.42588	0.0276527	6	1.07338	0.0642412	6	1.04345	0.119438	6	0.08755	0.0747779	6	0.812383	0.155452	6	0.889083	0.0695568	6	0.694317	0.0295641	6	1.05278	0.0482095	6	1.3975	0.126489	6	1.37095	0.0623524	6
	12	1.47573	0.0285182	6	1.18688	0.0523747	6	1.12795	0.127583	6	0.148517	0.109683	6	0.85915	0.155798	6	0.999483	0.0528543	6	0.906517	0.0221145	6	1.16752	0.0405375	6	1.44218	0.130502	6	1.42203	0.0704806	6
	13	1.51401	0.0261099	6	1.25705	0.0371161	6	1.20762	0.127163	6	0.225433	0.131949	6	0.901217	0.154086	6	1.07527	0.048454	6	1.02452	0.02478	6	1.26787	0.0488744	6	1.47798	0.132227	6	1.46155	0.0756792	6
	14	1.54894	0.0256451	6	1.32078	0.0244691	6	1.27872	0.119696	6	0.3254	0.114942	6	0.958633	0.152131	6	1.15253	0.0453063	6	1.11412	0.0267889	6	1.35813	0.0397568	6	1.51323	0.12753	6	1.49985	0.0775672	6
	15	1.58038	0.0269943	6	1.38452	0.0222351	6	1.3408	0.109706	6	0.39535	0.0938821	6	1.00502	0.151174	6	1.21142	0.0407855	6	1.21605	0.0261437	6	1.43603	0.0375038	6	1.54267	0.127566	6	1.52868	0.0806093	6
	16	1.60472	0.0276756	6	1.43075	0.0184966	6	1.3907	0.10693	6	0.45545	0.0856433	6	1.04703	0.138261	6	1.25795	0.0376941	6	1.2888	0.0236808	6	1.49673	0.0374866	6	1.5641	0.124833	6	1.55307	0.0831551	6
	17	1.62106	0.0261735	6	1.472	0.0200524	6	1.43595	0.106698	6	0.5168	0.0952026	6	1.08678	0.11929	6	1.30878	0.0363044	6	1.35162	0.0220027	6	1.54923	0.0376574	6	1.58575	0.115092	6	1.57577	0.0795983	6
	18	1.63423	0.0252504	6	1.51235	0.0207913	6	1.47282	0.102716	6	0.582167	0.129799	6	1.11083	0.114729	6	1.35238	0.0343773	6	1.4096	0.0215909	6	1.59598	0.037133	6	1.60278	0.108082	6	1.59363	0.0764576	6
	19	1.63954	0.0261985	6	1.53748	0.0220843	6	1.50582	0.0948743	6	0.63625	0.119764	6	1.13205	0.118273	6	1.3885	0.0325826	6	1.4584	0.0207945	6	1.6284	0.0373386	6	1.61332	0.103577	6	1.60672	0.0716573	6
	20	1.64282	0.0260056	6	1.56317	0.0235409	6	1.53282	0.0904758	6	0.722083	0.130756	6	1.15483	0.122602	6	1.42182	0.0302324	6	1.50127	0.0201096	6	1.65278	0.0330849	6	1.62423	0.0928259	6	1.61942	0.0652937	6
	21	1.64761	0.0264291	6	1.58745	0.0247113	6	1.55652	0.0895281	6	0.80325	0.137927	6	1.17993	0.122455	6	1.45337	0.0288031	6	1.53747	0.0180517	6	1.66872	0.0322435	6	1.63535	0.0768558	6	1.63152	0.0569237	6
	22	1.65212	0.025734	6	1.61412	0.0243289	6	1.57562	0.0848052	6	0.876167	0.132392	6	1.19935	0.123529	6	1.47385	0.0287658	6	1.56845	0.0169846	6	1.68225	0.030222	6	1.64085	0.0716872	6	1.63818	0.0542654	6
	23	1.65006	0.0259695	6	1.62163	0.0251007	6	1.59368	0.0775489	6	0.934433	0.130358	6	1.22133	0.12538	6	1.49705	0.0294996	6	1.58633	0.016098	6	1.68705	0.0297069	6	1.64432	0.0622563	6	1.6415	0.0523197	6
	24	1.65575	0.0268499	6	1.63975	0.026079	6	1.60877	0.0709937	6	0.986583	0.131329	6	1.2469	0.124208	6	1.51928	0.0260018	6	1.6017	0.0160424	6	1.69557	0.0292658	6	1.65197	0.0504025	6	1.64878	0.0511383	6
