# Supplementary material for: The evolutionary mechanism of non-carbapenemase carbapenem-resistant phenotypes in Klebsiella spp
Source: eLife. 2023 Jul 6;12:e83107. doi: 10.7554/eLife.83107 (PMC10325707; doi:10.7554/eLife.83107)
Supplement: Figure 1—source data 6. [file elife-83107-fig1-data6.xlsx]

## Sheet: Sheet1
Figure 1-source data 4
MIC analysis of E. coli BW25113 expressing DeepBL candidates.
Antimicrobial	MIC (µg/ml) a
drug	pJP-CmR	No Vector	pJP-blaDHA-1	pJP- blaOKP-B-21	pJP-blaSHK	pJP-blaOPHC	pJP-blaDAE	pJP-blaABH	pJP-blaDAC	pJP-blaTRN
Cephems
Cefazolin	2	2	256	8	2	2	1	2	2	2
Cefotaxime	0.06	0.06	32	0.06	0.03	0.03	0.03	0.06	0.06	0.03
Ceftazidime	0.25	0.25	128	1	0.12	0.06	0.06	0.12	0.25	0.25
Carbapenems
Ertapenem	0.016	0.016	0.03	0.008	0.008	0.008	0.008	0.008	0.008	0.008
Imipenem	0.25	0.25	0.5	0.12	0.25	0.12	0.12	0.12	0.12	0.25
Meropenem	0.016	0.016	0.03	0.016	0.016	0.016	0.016	0.016	0.016	0.016
MIC analysis of FK688 pNAR1ΔblaDHA-1 strains expressing DHA-1
Antimicrobial drug	MIC (µg/ml) a
	ΔompK36 pNAR1ΔblaDHA-1			ΔompK36 pNAR1–			ompK36+ pNAR1ΔblaDHA-1
	pJP-CmR	pJP-blaDHA-1		pJP-Cm	pJP-blaDHA-1		pJP-Cm	pJP-blaDHA-1
Ceftazidime	0.5	1024		0.5	1024		0.5	512
Ertapenem	0.5	32		1	16		0.016	0.5
Imipenem	0.25	4		0.25	4		0.12	0.25
Meropenem	0.12	2		0.12	1		0.016	0.03
a Drug-sensitive, italics; drug-resistant, bold-text
