# Supplementary material for: The evolutionary mechanism of non-carbapenemase carbapenem-resistant phenotypes in Klebsiella spp
Source: eLife. 2023 Jul 6;12:e83107. doi: 10.7554/eLife.83107 (PMC10325707; doi:10.7554/eLife.83107)
Supplement: Figure 3—source data 1. [file elife-83107-fig3-data1.xlsx]

## Sheet: Sheet1
Figure 3-source data 1
Figure 3 Source Data 1. Growth rate analysis of K. quasipneumoniae strains
Source data		OD600
	Time (hours)	ompK36+ pNAR1									ompK36+ pNAR1∆blaDHA-1									∆ompK36 pNAR1									∆ompK36 pNAR1∆blaDHA-1									∆ompK36 pNAR1-
	0:00:00	0.001	0.003	0.004	0.005	0.001	0.001	0	0.001	0.002	0.001	0.003	0.001	0.002	0.002	0.001	0.001	0.001	0.001	0	0.001	0	0	0	0.001	0.002	0.001	0.001	0.001	0.001	0.001	0.001	0.003	0.001	0.001	0.001	0.001	0.001	0.002	0.002	0.002	0.001	0.002	0.001	0.002	0.002
	1:00:00	0.002	0.004	0.005	0.007	0.002	0.002	0.002	0.002	0.003	0.002	0.004	0.002	0.003	0.003	0.002	0.002	0.002	0.002	0.001	0.001	0.001	0.001	0.001	0.001	0.002	0.001	0.002	0.002	0.002	0.001	0.002	0.003	0.002	0.002	0.002	0.002	0.002	0.003	0.003	0.003	0.002	0.002	0.002	0.002	0.002
	2:00:00	0.02	0.022	0.022	0.021	0.017	0.016	0.016	0.015	0.017	0.015	0.017	0.015	0.016	0.016	0.014	0.013	0.014	0.014	0.01	0.009	0.009	0.008	0.008	0.01	0.009	0.008	0.009	0.013	0.013	0.012	0.015	0.015	0.015	0.013	0.014	0.014	0.016	0.017	0.016	0.014	0.013	0.012	0.014	0.014	0.014
	3:00:00	0.174	0.177	0.168	0.151	0.152	0.147	0.142	0.139	0.14	0.133	0.141	0.13	0.137	0.129	0.128	0.116	0.125	0.118	0.076	0.074	0.07	0.069	0.065	0.072	0.06	0.06	0.06	0.105	0.106	0.1	0.115	0.113	0.114	0.113	0.114	0.108	0.123	0.131	0.119	0.102	0.101	0.093	0.107	0.104	0.104
	4:00:00	0.739	0.735	0.705	0.699	0.726	0.67	0.642	0.627	0.601	0.631	0.642	0.614	0.661	0.61	0.599	0.591	0.603	0.565	0.433	0.427	0.4	0.395	0.407	0.433	0.364	0.364	0.34	0.56	0.566	0.539	0.582	0.572	0.539	0.618	0.605	0.533	0.604	0.626	0.569	0.54	0.524	0.473	0.526	0.505	0.512
	5:00:00	1.111	1.1	1.094	1.105	1.09	1.054	1.067	1.053	1.002	1.1	1.087	1.061	1.088	1.033	1.018	1.043	1.043	1.016	0.914	0.895	0.892	0.869	0.891	0.863	0.837	0.86	0.798	0.994	0.997	0.998	0.981	0.981	0.95	0.992	0.984	0.924	0.981	0.992	0.984	0.974	0.969	0.905	0.954	0.926	0.94
	6:00:00	1.243	1.228	1.222	1.237	1.216	1.185	1.217	1.199	1.171	1.25	1.238	1.219	1.229	1.192	1.17	1.201	1.198	1.173	1.077	1.046	1.079	1.054	1.055	1.037	1.029	1.048	1.039	1.153	1.156	1.149	1.135	1.132	1.122	1.135	1.127	1.088	1.13	1.144	1.147	1.133	1.126	1.096	1.106	1.101	1.092
	7:00:00	1.333	1.314	1.31	1.324	1.303	1.273	1.307	1.283	1.269	1.347	1.337	1.314	1.324	1.298	1.267	1.3	1.295	1.278	1.177	1.143	1.175	1.159	1.151	1.135	1.13	1.152	1.148	1.264	1.259	1.255	1.241	1.233	1.227	1.237	1.23	1.204	1.23	1.245	1.247	1.23	1.224	1.2	1.21	1.207	1.187
	8:00:00	1.397	1.377	1.372	1.386	1.367	1.338	1.372	1.351	1.344	1.422	1.412	1.388	1.396	1.381	1.343	1.376	1.375	1.363	1.269	1.235	1.253	1.24	1.234	1.214	1.212	1.232	1.235	1.342	1.333	1.333	1.317	1.307	1.307	1.316	1.303	1.289	1.308	1.318	1.319	1.307	1.299	1.281	1.291	1.287	1.267
	9:00:00	1.443	1.425	1.418	1.431	1.41	1.385	1.418	1.398	1.397	1.472	1.465	1.444	1.448	1.435	1.398	1.424	1.426	1.419	1.324	1.287	1.298	1.281	1.277	1.264	1.261	1.276	1.283	1.392	1.383	1.381	1.368	1.356	1.354	1.363	1.354	1.332	1.363	1.374	1.372	1.362	1.355	1.332	1.342	1.34	1.321
	10:00:00	1.476	1.463	1.452	1.468	1.446	1.422	1.453	1.433	1.439	1.519	1.509	1.49	1.491	1.483	1.444	1.473	1.472	1.469	1.377	1.342	1.358	1.345	1.344	1.33	1.322	1.335	1.342	1.436	1.425	1.424	1.412	1.401	1.401	1.41	1.395	1.38	1.407	1.417	1.413	1.407	1.399	1.381	1.389	1.388	1.371
	11:00:00	1.511	1.489	1.478	1.494	1.476	1.452	1.484	1.464	1.47	1.564	1.551	1.535	1.532	1.525	1.486	1.514	1.513	1.517	1.417	1.377	1.406	1.393	1.394	1.373	1.364	1.38	1.397	1.468	1.455	1.452	1.437	1.423	1.42	1.441	1.421	1.405	1.437	1.445	1.443	1.435	1.428	1.411	1.415	1.416	1.402
	12:00:00	1.537	1.52	1.51	1.524	1.502	1.484	1.515	1.499	1.508	1.593	1.58	1.565	1.558	1.555	1.518	1.546	1.548	1.556	1.456	1.414	1.447	1.435	1.43	1.401	1.394	1.425	1.436	1.49	1.474	1.472	1.46	1.45	1.451	1.457	1.445	1.439	1.464	1.475	1.469	1.46	1.457	1.443	1.447	1.451	1.434
	13:00:00	1.56	1.546	1.532	1.543	1.523	1.512	1.537	1.523	1.538	1.615	1.606	1.591	1.585	1.583	1.549	1.572	1.576	1.585	1.48	1.434	1.468	1.459	1.448	1.428	1.427	1.449	1.47	1.509	1.492	1.489	1.48	1.469	1.471	1.476	1.463	1.461	1.481	1.498	1.485	1.477	1.474	1.461	1.466	1.47	1.457
	14:00:00	1.574	1.558	1.543	1.554	1.532	1.524	1.551	1.54	1.556	1.63	1.62	1.606	1.597	1.599	1.563	1.586	1.592	1.603	1.494	1.447	1.482	1.472	1.459	1.435	1.432	1.462	1.487	1.519	1.499	1.495	1.484	1.473	1.477	1.48	1.468	1.471	1.491	1.504	1.493	1.481	1.481	1.468	1.471	1.477	1.468
	15:00:00	1.589	1.577	1.561	1.569	1.547	1.541	1.566	1.558	1.575	1.645	1.639	1.624	1.615	1.618	1.585	1.606	1.612	1.623	1.509	1.46	1.493	1.483	1.469	1.445	1.447	1.479	1.507	1.533	1.513	1.508	1.498	1.488	1.494	1.493	1.481	1.49	1.501	1.516	1.503	1.491	1.492	1.48	1.483	1.49	1.485
	16:00:00	1.602	1.587	1.57	1.577	1.555	1.551	1.576	1.57	1.588	1.651	1.644	1.634	1.621	1.626	1.596	1.612	1.623	1.636	1.522	1.471	1.502	1.491	1.476	1.451	1.45	1.487	1.519	1.54	1.518	1.511	1.499	1.488	1.496	1.495	1.486	1.497	1.508	1.519	1.508	1.493	1.494	1.483	1.484	1.492	1.492
	17:00:00	1.609	1.601	1.585	1.59	1.569	1.565	1.589	1.583	1.602	1.66	1.652	1.641	1.629	1.633	1.605	1.622	1.633	1.643	1.534	1.481	1.511	1.501	1.486	1.459	1.461	1.502	1.532	1.555	1.534	1.522	1.511	1.5	1.508	1.506	1.499	1.513	1.522	1.529	1.514	1.5	1.5	1.492	1.492	1.501	1.5
	18:00:00	1.614	1.605	1.589	1.595	1.572	1.576	1.595	1.592	1.613	1.666	1.657	1.646	1.634	1.637	1.609	1.626	1.636	1.649	1.544	1.491	1.518	1.51	1.496	1.467	1.469	1.51	1.543	1.556	1.537	1.526	1.517	1.508	1.513	1.512	1.508	1.519	1.523	1.532	1.519	1.507	1.506	1.5	1.496	1.506	1.506
	19:00:00	1.615	1.605	1.589	1.594	1.573	1.578	1.596	1.592	1.612	1.67	1.66	1.649	1.636	1.639	1.612	1.628	1.637	1.651	1.55	1.5	1.526	1.517	1.501	1.477	1.477	1.515	1.552	1.556	1.536	1.525	1.51	1.505	1.513	1.51	1.506	1.52	1.524	1.529	1.518	1.505	1.502	1.496	1.494	1.507	1.508
	20:00:00	1.62	1.612	1.596	1.6	1.577	1.581	1.599	1.598	1.618	1.675	1.665	1.655	1.638	1.646	1.62	1.637	1.646	1.657	1.554	1.505	1.527	1.52	1.505	1.481	1.485	1.522	1.556	1.564	1.543	1.533	1.519	1.509	1.517	1.516	1.512	1.525	1.532	1.536	1.522	1.51	1.507	1.499	1.5	1.511	1.511
	21:00:00	1.624	1.613	1.597	1.603	1.58	1.582	1.601	1.6	1.62	1.673	1.661	1.652	1.631	1.641	1.615	1.634	1.647	1.66	1.559	1.512	1.529	1.523	1.507	1.481	1.486	1.524	1.558	1.568	1.545	1.534	1.52	1.509	1.514	1.518	1.514	1.525	1.536	1.537	1.526	1.514	1.51	1.5	1.502	1.513	1.513
	22:00:00	1.629	1.62	1.603	1.609	1.585	1.587	1.605	1.604	1.624	1.678	1.663	1.653	1.633	1.643	1.617	1.635	1.649	1.662	1.566	1.519	1.535	1.532	1.516	1.486	1.493	1.532	1.565	1.577	1.555	1.544	1.53	1.517	1.522	1.526	1.522	1.535	1.547	1.548	1.532	1.522	1.518	1.507	1.509	1.518	1.518
	23:00:00	1.63	1.617	1.602	1.609	1.586	1.589	1.606	1.608	1.625	1.676	1.658	1.646	1.631	1.636	1.607	1.628	1.641	1.658	1.571	1.523	1.539	1.534	1.518	1.485	1.492	1.531	1.568	1.577	1.553	1.541	1.526	1.513	1.52	1.524	1.52	1.533	1.543	1.548	1.536	1.523	1.521	1.507	1.51	1.52	1.522
	24:00:00	1.629	1.623	1.608	1.612	1.588	1.593	1.608	1.61	1.629	1.683	1.661	1.646	1.632	1.636	1.607	1.63	1.641	1.655	1.577	1.528	1.542	1.539	1.524	1.493	1.501	1.54	1.576	1.582	1.559	1.55	1.536	1.522	1.528	1.53	1.526	1.542	1.547	1.553	1.539	1.527	1.526	1.514	1.517	1.526	1.528
