# Supplementary material for: The evolutionary mechanism of non-carbapenemase carbapenem-resistant phenotypes in Klebsiella spp
Source: eLife. 2023 Jul 6;12:e83107. doi: 10.7554/eLife.83107 (PMC10325707; doi:10.7554/eLife.83107)
Supplement: Figure 4—source data 1. [file elife-83107-fig4-data1.xlsx]

## Sheet: Sheet1
Figure 4-source data 1
Figure 4B	Normalised only LB media without antibiotics
Source data
		∆ompK36 pNAR1∆blaDHA-1				ΔompK36 pNAR1–				ompK36+ pNAR1				ompK36+ pNAR1∆blaDHA-1
	K. quasipneumoniae strains	0.077139	0.101543	0.0811063	0.0872509	0.12304	0.123902	0.130564	0.123715	0.123454	0.104265	0.106244	0.111003	0.134125	0.129011	0.125401	0.130509
Figure 4C	Normalised- LB media with increasing concentration of imipenem
Source data
	[Antibiotic]	∆ompK36 pNAR1∆blaDHA-1				ΔompK36 pNAR1–				ompK36+ pNAR1				ompK36+ pNAR1∆blaDHA-1
	IMI 0.03	0.0823981	0.0946917	0.0790552	0.0955711	0.0883054	0.114571	0.0742383	0.0491466	0.0169635	0.0258633	0.0159999	-0.0195555	0.110358	0.113338	0.0962207	0.113102
	IMI 0.06	0.0715583	0.0753145	0.0785732	0.0742248	0.0815333	0.0628953	0.0899585	0.0810057	0.0260897	0.0386557	0.0345251	0.011829	0.0772908	0.0930128	0.0829586	0.0572758
	IMI 0.125	-0.0366416	-0.0403823	-0.0375577	-0.0206622	-0.138607	-0.134999	-0.138413	-0.117317	-0.222175	-0.201351	-0.214157	-0.196268	-0.208027	-0.215546	-0.211109	-0.203936
	IMI 0.25	-0.217531	-0.226299	-0.224471	-0.22769	-0.298985	-0.288755	-0.223836	-0.220048	-0.194061	-0.193046	-0.182552	-0.187842	-0.216562	-0.211396	-0.204248	-0.206036
	IMI 0.5	-0.254439	-0.243597	-0.263306	-0.260623	-0.319117	-0.300827	-0.298343	-0.303876	-0.249282	-0.249348	-0.245067	-0.247699	-0.231101	-0.230897	-0.228658	-0.236788
