# Supplementary material for: The evolutionary mechanism of non-carbapenemase carbapenem-resistant phenotypes in Klebsiella spp
Source: eLife. 2023 Jul 6;12:e83107. doi: 10.7554/eLife.83107 (PMC10325707; doi:10.7554/eLife.83107)
Supplement: Figure 5—source data 2. [file elife-83107-fig5-data2.xlsx]

## Sheet: Sheet1
Figure 5-source data 2
Figure 5D.	Relative numbers of opaque colonies in the 20 replicate populations of FK688 ΔompK36 pNAR1 (lineage A) and ompK36+pNAR1 (lineage B) strains after 200 generations
Source data:	Colony count
	Lineage A						Lineage B
	Replicates	Opaque	Translucent	Ratio			Replicates	Opaque	Translucent	Ratio
	A1	229	154	0.597911			B1	0	411	0
	A2	350	248	0.585284			B2	0	393	0
	A3	408	236	0.63354			B3	1	594	0.00168067
	A4	233	277	0.456863			B4	0	264	0
	A5	147	678	0.178182			B5	2	612	0.00325733
	A6	55	130	0.297297			B6	0	521	0
	A7	150	450	0.25			B7	0	568	0
	A8	161	573	0.219346			B8	0	1516	0
	A9	209	353	0.371886			B9	0	876	0
	A10	110	168	0.395683			B10	1	507	0.0019685
	A11	126	354	0.2625			B11	0	684	0
	A12	44	262	0.143791			B12	0	621	0
	A13	8	425	0.0184758			B13	1	222	0.0044843
	A14	268	288	0.482014			B14	0	228	0
	A15	102	182	0.359155			B15	1	175	0.00568182
	A16	86	211	0.289562			B16	0	214	0
	A17	144	151	0.488136			B17	0	287	0
	A18	83	390	0.175476			B18	0	319	0
	A19	235	340	0.408696			B19	No data
	A20	61	135	0.311224			B20	0	130	0
		3209	6005	9214	Total			6	9142	9148	Total
		0.3483	0.6517	1				0.00065589	0.999344	1
			AVG	0.346251					AVG	0.000898559
			STDEV	0.163196					STDEV	0.00173783
			CI	0.0715226					CI	0.000761625
