# Supplementary material for: The evolutionary mechanism of non-carbapenemase carbapenem-resistant phenotypes in Klebsiella spp
Source: eLife. 2023 Jul 6;12:e83107. doi: 10.7554/eLife.83107 (PMC10325707; doi:10.7554/eLife.83107)
Supplement: Figure 5—source data 3. [file elife-83107-fig5-data3.xlsx]

## Sheet: Sheet1
Figure 5-source data 3
FK688 OmpK36+, B3(o) and B3(t) genome modification and SNP analysis
Location	Position 5’-3’	FK688	B3(o)	B3(t)		Gene or locus tag	Product	Commentsa
		(ompK36+)
SNP
Chromosome	3043769	A	C	C		smc_1	Chromosome partition protein Smc/Phage tail fiber protein	multiple aa replacement (all strains 4195 aa)
Chromosome	3059679	G	A	A		LKCPGFBJ_02921	Phage tail assembly	aa replacement alanine (A)
								→valine (V) in B3O and B3T
Plasmid	4965230	T	C	C		kdgK_2	IS3 family element, transposase	Frameshift mutation in B3O and B3T
Plasmid	252465	A	G	G		kdgK_2	IS3 family element, transposase	Frameshift mutation in B3O and B3T
Location	Position 5’-3’	FK688b	B3(o) b	B3(t)	Product		Gene(s) affected
		(ompK36+)
Gene modification
Chromosome	635081	473 aa	61 aa/ 398aa	473 aa	Deletion of 14 aa = 2 fractions of the protein in B3O		PEP-dependent dihydroxyacetone kinase, phosphoryl donor subunit DhaM
Chromosome	828825	N/A	Insertion	N/A	IS4-like element ISVsa5 family transposase		Intergenic: Fimbrial subunit type 1 (fim) and Type 1 frimbrial regulatory protein (fimE)
Chromosome	846077	N/A	N/A	Insertion	IS4-like element ISVsa5 family transposase		Intergenic: putative fimbrial like protein and phosphodiesterase MrkJ
Chromosome	1707109	N/A	N/A	Insertion	IS4-like element ISVsa5 family transposase		Intragenic: UDP-glucose: undecaprenyl-phosphateglucose-1-phosphate transferase (wcaJ)
Chromosome	2790888	N/A	N/A	Insertion	IS4-like element ISVsa5 family transposase		Intergenic: IS4-like element ISVsa5 family transposase and Putative ATP-binding component of a transport system
Chromosome	3672516	N/A	N/A	Insertion	IS4-like element ISVsa5 family transposase		Intragenic: ABC transporter, substrate-binding protein KPN
FK688, A2(o) and A2(t) genome modification and SNP analysis
Location	Position 5’-3’	FK688	A2(o)	A2(t)	Gene or locus tag		Product	Comments a
		∆ompK36
SNP
Chromosome	516205	G	C	C	LptB_3		LPS export system ATP binding protein LptB	2 ORF LptB in FK688
Chromosome	516218	T	C	C	LptB_3		LPS export system ATP binding protein LptB	2 ORF LptB in FK688
Chromosome	1708336	A	C	C	WcaA		colanic acid biosynthesis glycosyl transferase WcaA	No changes in protein alignment
Chromosome	2791894	A	A	G	novR		Decarboxylase NovR	change lysine (K) --> glutamic acid (E) in A2T
Chromosome	3043149	A	G	G	smc_1		Chromosome partition protein Smc.	4126 aa in FK688 --> 4195 aa in A2O and A2T
Chromosome	3060399	G	A	A	CKCOFDID_02924		HK97 gp10 family phage protein	No changes in protein alignment
Chromosome	3060738	A	G	G	CKCOFDID_02925		Phage head closure protein	No changes in protein alignment
Chromosome	3843320	G	T	G	cad		Transcriptional activator of cad operon	change asparagine (N) --> lysine (K) in A2O
Plasmid	252465	A	G	G	kdgK_2		IS3 family element, transposase	Frameshift mutation leucine(L) --> proline (P) in A2O and A2T
Plasmid	252473	T	C	C	kdgK_2		IS3 family element, transposase	Frameshift mutation in A2O and A2T
Plasmid	252525	N	C	C	kdgK_2		IS3 family element, transposase	Frameshift mutation in A2O and A2T
Location	Position 5’-3’	FK688 b	A2(o)	A2(t)				Gene(s) affected
		∆ompK36				Product
Gene modification
Chromosome	2940465	N/A	N/A	Insertion		IS4-like element ISVsa5 family transposase		Intragenic: N,N'-diacetylchitobiose-specific 6-phospho-beta-glucosidase (chbF)
Chromosome	4547776	N/A	N/A	Change		aa replacement aspartic acid (D) for glutamic acid (E)		outer membrane porine_Maltoporin _LamB_3
a aa: amino acid, b N/A: no applicable
