# Supplementary material for: The evolutionary mechanism of non-carbapenemase carbapenem-resistant phenotypes in Klebsiella spp
Source: eLife. 2023 Jul 6;12:e83107. doi: 10.7554/eLife.83107 (PMC10325707; doi:10.7554/eLife.83107)
Supplement: Figure 5—source data 4. [file elife-83107-fig5-data4.xlsx]

## Sheet: Sheet1
Figure 5-source data 4
Figure 5E. Glucuronic acid measurement of ancestral and evolved strains
		Kq1									Kq4
	Δompk36 pNAR1			ΔompK36 pNAR1ΔblaDHA-1[EV-O]			ΔompK36 pNAR1 ΔblaDHA-1[EV-T]			ompK36+ pNAR1			ompK36 pNAR1ΔblaDHA-1[EV-O]			ompK36 pNAR1ΔblaDHA-1[EV-T]			B5055			B5055nm
	56.7	61.2818	69.1727	63.1581	59.1756	71.0459	26.5489	14.4441	19.5591	54.918	59.856	59.3968	74.5365	70.3753	74.3856	7.16582	24.0853	21.3387	118.491	79.6091	114.164	7	15.4318	15.0182
Source data
		Sample	concentration (mg/mL)	CFU	[Normalised CFU] (µg/mL)			Sample	Average concentration biological triplicates (mg/mL)
		A2O (1)	63.1581	115	0.549201			A2O	64.4598
		A2O (2)	59.1756	135	0.438338			A2T	20.184
		A2O (3)	71.0459	250	0.284184			B3O	73.0991
		A2T (1)	26.5489	199	0.133412			B3T	17.5299
		A2T (2)	14.4441	201	0.0718613			B5055	104.088
		A2T (3)	19.5591	153	0.127837			B5055nm	12.4833
		B3O (1)	74.5365	123	0.605988			Kq1	62.3848
		B3O (2)	70.3753	183	0.384564			Kq4	58.0569
		B3O (3)	74.3856	185	0.402084
		B3T (1)	7.16582	136	0.0526899
		B3T (2)	24.0853	201	0.119828			Sample	Strain				Average concentration biological triplicates (mg/mL)			CFU x 10^6		[Normalised CFU] (µg/mL)
		B3T (3)	21.3387	194	0.109993			B5055nm	B5055nm				12.4833			61.6667		0.202432
		B5055 + (1)	118.491	136	0.871257			B5055	B5055				104.088			127		0.81959
		B5055 + (2)	79.6091	65	1.22476			B3T	ompK36 pNAR1 Δ(tnpA-sul1)[EV-T]				17.5299			177		0.0990392
		B5055 + (3)	114.164	180	0.634242			B3O	ompK36 pNAR1 Δ(tnpA-sul1)[EV-O]				73.0991			163.667		0.446634
		B5055nm (1)	7	65	0.107692			Kq4	ompK36 pNAR1				58.0569			165.333		0.351151
		B5055nm (2)	15.4318	66	0.233815			A2T	ΔompK36 pNAR1 Δ(tnpA-sul1)[EV-T]				20.184			184.333		0.109497
		B5055nm (3)	15.0182	54	0.278114			A2O	ΔompK36 pNAR1 Δ(tnpA-sul1)[EV-O]				64.4598			166.667		0.386759
		Kq1 (1)	56.7	97	0.584536			Kq1	ΔompK36 pNAR1				62.3848			182.667		0.341523
		Kq1 (2)	61.2818	182	0.336713
		Kq1 (3)	69.1727	269	0.257148
		Kq4 (1)	54.918	135	0.4068
		Kq4 (2)	59.856	165	0.362763
		Kq4 (3)	59.3968	196	0.303045
