# Supplementary material for: The evolutionary mechanism of non-carbapenemase carbapenem-resistant phenotypes in Klebsiella spp
Source: eLife. 2023 Jul 6;12:e83107. doi: 10.7554/eLife.83107 (PMC10325707; doi:10.7554/eLife.83107)
Supplement: Figure 6—source data 1. [file elife-83107-fig6-data1.xlsx]

## Sheet: Sheet1
Figure 6-source data 1
Figure 6A	Normalised- LB media with increasing concentration of ceftazidime
Source data
	[Antibiotic]	∆ompK36 pNAR1∆blaDHA-1				ΔompK36 pNAR1–				ompK36+ pNAR1				ompK36+ pNAR1∆blaDHA-1
	CAZ 0.125	0.112053	0.108318	0.112895	0.102382	0.138676	0.133215	0.143397	0.14185	0.115709	0.0996721	0.110748	0.107957	0.0984488	0.115995	0.117434	0.105341
	CAZ 0.25	-0.201476	-0.204814	-0.188754	-0.187091	-0.183787	-0.181126	-0.18998	-0.171237	0.130151	0.124532	0.120705	0.127842	-0.259572	-0.249563	-0.258172	-0.213736
	CAZ 0.5	-0.260832	-0.272651	-0.253811	-0.287383	-0.240195	-0.266838	-0.259185	-0.278859	0.11247	0.117048	0.122988	0.114102	-0.24616	-0.231747	-0.249428	-0.277342
	CAZ 1	-0.275771	-0.226533	-0.252171	-0.272319	-0.24927	-0.264458	-0.30192	-0.237074	0.121394	0.12712	0.125811	0.120599	-0.259026	-0.231427	-0.274952	-0.226393
	CAZ 2	-0.236502	-0.262492	-0.258794	-0.263676	-0.248302	-0.269773	-0.259595	-0.228197	0.114047	0.125723	0.11609	0.11509	-0.283517	-0.267931	-0.263735	-0.263564
