# Supplementary material for: The evolutionary mechanism of non-carbapenemase carbapenem-resistant phenotypes in Klebsiella spp
Source: eLife. 2023 Jul 6;12:e83107. doi: 10.7554/eLife.83107 (PMC10325707; doi:10.7554/eLife.83107)
Supplement: Figure 6—source data 2. [file elife-83107-fig6-data2.xlsx]

## Sheet: Sheet1
Figure 6-source data 2
Figure 6B. Fitness landscape
Source data:	Number of colonies in different imipenem concentrations
		Summary:
			Strains							Strain genotype:		MIC
		Imipenem [μg/ml]	Kq1	Kq2	Kq3	Kq4	Kq5
		16	0	0	0	0	0			Kq1	ΔompK36– pNAR1	8
		8	104	0	0	0	0			Kq2	ΔompK36– pNAR1ΔblaDHA-1	0.25
		4	392	0	0	0	0			Kq3	ΔompK36– pNAR1–	0.25
		2	TMTC	0	0	0	0			Kq4	ompK36+ pNAR1	1
		1	TMTC	0	0	202	0			Kq5	ompK36+ pNAR1ΔblaDHA-1	0.12
		0.5	TMTC	0	0	TMTC	0
		0.25	TMTC	253	298	TMTC	0
		0.12	TMTC	412	598	TMTC	22
		0.06	TMTC	TMTC	TMTC	TMTC	TMTC
